# Supplementary material for: Salazinic Acid and Norlobaridone from the Lichen Hypotrachyna cirrhata: Antioxidant Activity, α-Glucosidase Inhibitory and Molecular Docking Studies
Source: MDPI journal article supplement (doi:10.3390/molecules28237840), 2023-11-29
Supplement: s1 [file s1]

### Physicochemical data of isolated compounds:

**Salazinic acid (11):** Light brown colour solid;  $^1\text{H}$  NMR (500MHz, DMSO- $d_6$ ):  $\delta$  10.25 (1H, s), 6.87 (2H, s), 4.59 (2H, s), 2.44 (3H, s);  $^{13}\text{C}$  NMR (100MHz, DMSO- $d_6$ ):  $\delta$  192.72, 165.93, 164.00, 163.56, 160.30, 152.85, 152.29, 148.11, 138.03, 137.29, 123.41, 117.41, 111.93, 110.64, 109.68, 95.07, 52.68, 21.43 ppm. HRESI-MS:  $m/z$  387.0357 [M-H] $^-$  (calcd. for  $\text{C}_{18}\text{H}_{11}\text{O}_{10}$ , 387.0352).

**Norlobaridone (12):** White amorphous powder;  $^1\text{H}$  NMR (500MHz, DMSO- $d_6$ ):  $\delta$  9.83 (1H, brs), 6.78 (1H, d,  $J$  = 2.28 Hz), 6.75 (1H, d,  $J$  = 2.13 Hz), 6.54 (1H, d,  $J$  = 2.89 Hz), 6.51 (1H, d,  $J$  = 2.74 Hz), 2.75 (2H, t,  $J$  = 7.32 Hz), 2.62 (2H, t,  $J$  = 7.62 Hz), 1.56-1.49 (4H, m), 1.35-1.28 (6H, m), 0.88-0.85 (6H, m).  $^{13}\text{C}$  NMR (100 MHz, DMSO- $d_6$ ):  $\delta$  203.39, 163.14, 162.84, 162.53, 154.90, 148.88, 144.01, 140.72, 136.10, 113.19, 112.05, 109.56, 107.32, 105.23, 41.11, 31.07, 29.96, 29.08, 25.54, 21.94, 21.47, 13.89, 13.79 ppm. HRESI-MS:  $m/z$  397.1647 [M-H] $^-$  (calcd for  $\text{C}_{23}\text{H}_{25}\text{O}_6$ , 397.1651).

**Atranorin (13):** Light yellow powder;  $^1\text{H}$  NMR (500 MHz,  $\text{CDCl}_3$ ):  $\delta$  12.55 (1H, s), 12.49 (1H, s), 11.94 (1H, s), 10.35 (1H, s), 6.52 (1H, s), 6.40 (1H, s), 3.98 (3H, s), 2.70 (3H, s), 2.54 (3H, s), 2.09 (3H, s);  $^{13}\text{C}$  NMR (100 MHz,  $\text{CDCl}_3$ ):  $\delta$  193.79, 172.16, 169.65, 169.03, 167.44, 162.83, 152.39, 151.95, 139.83, 116.74, 115.99, 112.81, 110.23, 108.51, 102.81, 52.30, 25.54, 23.98, 9.33 ppm. HRESI-MS:  $m/z$  373.0927 [M-H] $^-$  (calcd for  $\text{C}_{19}\text{H}_{17}\text{O}_8$ , 373.0923).

**Lecanoric acid (14):** Isolated as a white amorphous powder;  $^1\text{H}$  NMR (500 MHz DMSO- $d_6$ ):  $\delta$  10.35 (1H, s), 10.08 (1H, s), 6.59 (2H, d,  $J$  = 3.2 Hz), 6.23 (2H, s), 2.36 (3H, s), 2.35 (3H, s);  $^{13}\text{C}$  NMR (100 MHz, DMSO- $d_6$ ):  $\delta$  170.61, 167.16, 161.10, 160.10, 158.74, 152.20, 140.35, 139.45, 116.79, 114.72, 109.88, 108.32, 107.36, 100.49, 21.35, 20.95 ppm. HRESI-MS:  $m/z$  317.0667 [M-H] $^-$  (calcd for  $\text{C}_{16}\text{H}_{13}\text{O}_7$ , 317.0661).

**(+) -Lichesterinic acid (15):** White amorphous powder;  $^1\text{H}$  NMR (400 MHz, Acetone- $d_6$ ):  $\delta$  5.16-5.13 (1H, m), 2.13 (3H, d,  $J$  = 2.06 Hz), 1.65 – 1.59 (1H, m), 1.39-1.28 (22H, m), 0.88 (3H, t,  $J$  = 6.63, 13.73 Hz);  $^{13}\text{C}$  NMR (100 MHz, Acetone- $d_6$ ):  $\delta$  174.21, 164.61, 150.03, 138.45, 82.83, 34.27, 33.62, 26.40, 24.31, 15.33, 11.81 ppm. HRESI-MS:  $m/z$  323.2221 [M-H] $^-$  (calcd for  $\text{C}_{19}\text{H}_{31}\text{O}_4$ , 323.2222).

**Protolichesterinic acid (16):** White amorphous powder;  $^1\text{H}$  NMR (400 MHz, Acetone- $d_6$ ):  $\delta$  6.27 (1H, d,  $J$  = 3.11 Hz), 5.98 (1H, d,  $J$  = 2.56 Hz), 4.78 (1H, q), 3.80 (1H, q), 1.80– 1.74 (2H, m), 1.46-1.29 (22H, m), 0.88 (3H, t,  $J$  = 6.78, 13.75 Hz);  $^{13}\text{C}$  NMR (100 MHz, Acetone- $d_6$ ):  $\delta$  171.95, 169.64, 136.25, 125.26, 80.87, 51.23, 37.19, 33.62, 26.61, 24.31, 15.33 ppm. HRESI-MS:  $m/z$  323.2223 [M-H] $^-$  (calcd for  $\text{C}_{19}\text{H}_{31}\text{O}_4$ , 323.2222).

**Methyl hematommate (17):** White amorphous powder;  $^1\text{H}$  NMR (400 MHz,  $\text{CD}_3\text{COCD}_3$ ):  $\delta$  11.98 (1H, s), 6.33 (1H, s), 3.91 (3H, s), 2.41 (3H, s), 2.30 (3H, s);  $^{13}\text{C}$  NMR (100 MHz,  $\text{CD}_3\text{COCD}_3$ ):  $\delta$  174.46, 165.05, 161.85, 141.53, 112.44, 110.45, 105.87, 53.10, 25.18, 9.05 ppm. HRESI-MS:  $m/z$  195.0658 [M-H] $^-$  (calcd for  $\text{C}_{10}\text{H}_{11}\text{O}_4$ , 195.0657).

**Iso-rhizonic acid, 2-Methoxy-3, 6-dimethyl-4-hydroxybenzoic acid (18):** White amorphous Powder;  $^1\text{H}$  NMR (400 MHz,  $\text{CD}_3\text{COCD}_3$ ):  $\delta$  10.30 (1H, s), 6.37 (1H, s), 3.99 (3H, s), 2.55 (3H, s);  $^{13}\text{C}$  NMR (100 MHz,  $\text{CD}_3\text{COCD}_3$ ):  $\delta$  195.54, 173.54, 169.36, 167.95, 154.33, 113.38, 110.01, 106.29, 53.89, 25.82 ppm. HRESI-MS:  $m/z$  195.0658 [M-H] $^-$  (calcd for  $\text{C}_{10}\text{H}_{11}\text{O}_4$ , 195.0657).

**Atranol (19):** White amorphous powder;  $^1\text{H}$  NMR (300 MHz,  $\text{CDCl}_3$ ):  $\delta$  10.27 (1H, s), 6.27 (2H, s), 2.25 (3H, s);  $^{13}\text{C}$  NMR (75 MHz,  $\text{CDCl}_3$ ):  $\delta$  193.67, 161.85, 150.69, 107.33, 22.08 ppm. HRESI-MS:  $m/z$  151.0396 [M-H] $^-$  (calcd for  $\text{C}_8\text{H}_7\text{O}_3$ , 151.0395).

**Methyl Atratate (20):** Yellow solid;  $^1\text{H}$  NMR (400 MHz, Acetone- $d_6$ ):  $\delta$  11.98 (1H, s), 6.36 (1H, s), 3.92 (3H, s), 2.41 (3H, s), 2.02 (3H, s);  $^{13}\text{C}$  NMR (100 MHz, Acetone- $d_6$ ):  $\delta$  174.44, 164.95, 162.30, 141.32, 112.56, 110.33, 105.53, 53.05, 25.17, 9.06; HRESI-MS:  $m/z$  196.0654 [M-H] $^-$  (calcd for  $\text{C}_{10}\text{H}_{11}\text{O}_4$ , 196.0657).

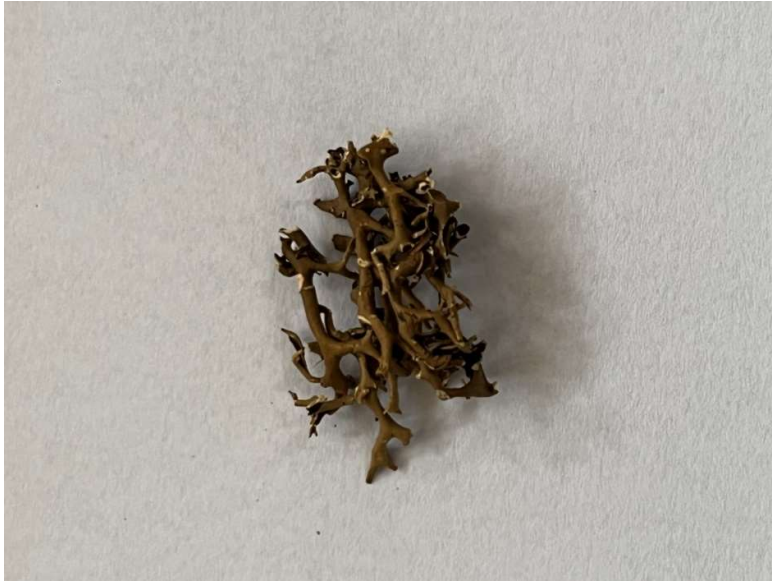

**Figure- S1:** The authenticate *Hypotrachyna cirrhata*(Fr) Hale

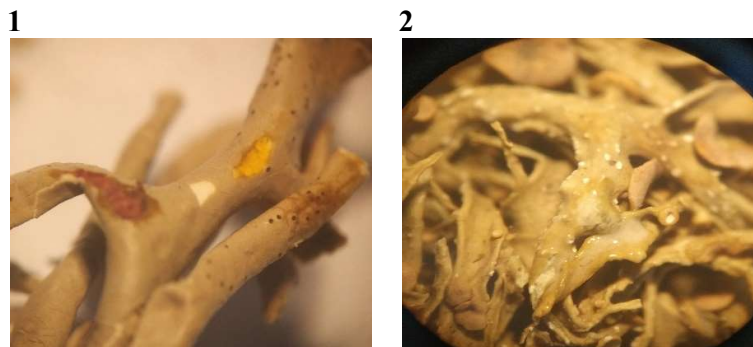

**Figure -S2:** The spot tests for identification of *Hypotrachyna cirrhata*

1= after K and P positive test (Reddish brown and Orange or Orange red) 2 = after C test (negative).

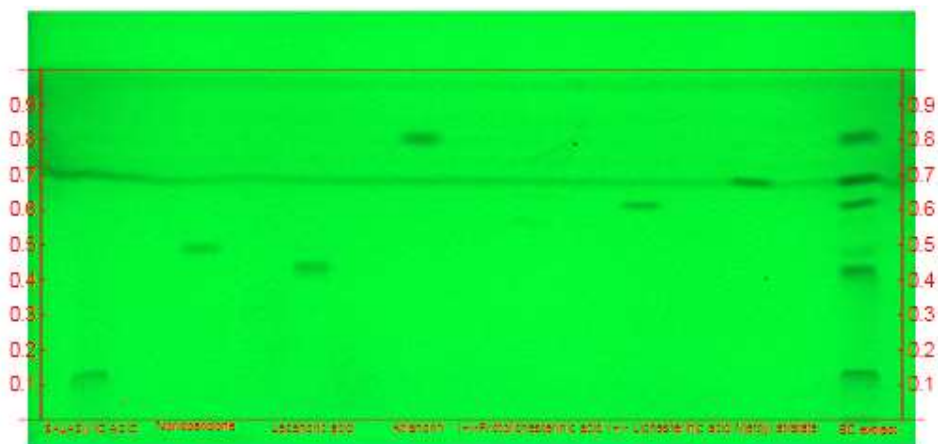

**Figure- S3:** HPTLC profiles for *Hypotrachyna cirrhata* extract along the standard compounds at 254 nm, TLC system: Toluene / 1, 4- Dioxane / Acetic acid – 84.0: 8.0: 8.0.

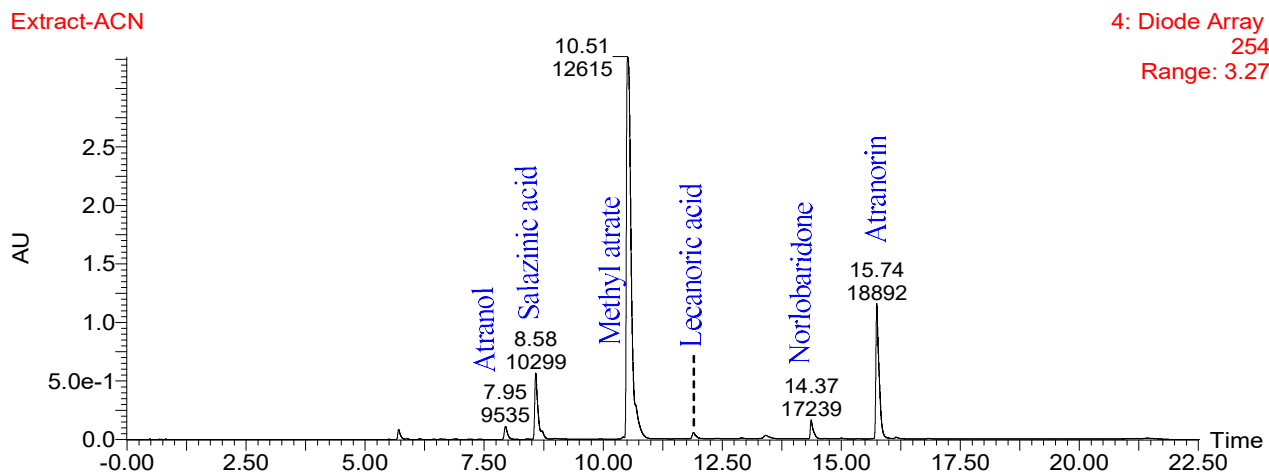

**Figure- S4:** UPLC-PDA chromatogram of acetone extract of *Hypotrachyna cirrhata*

A)

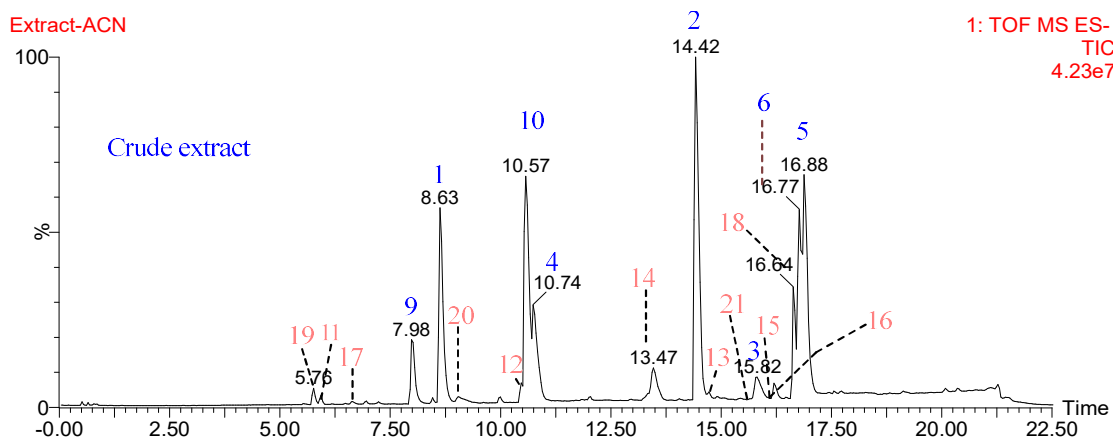

B)

Salazanic acid

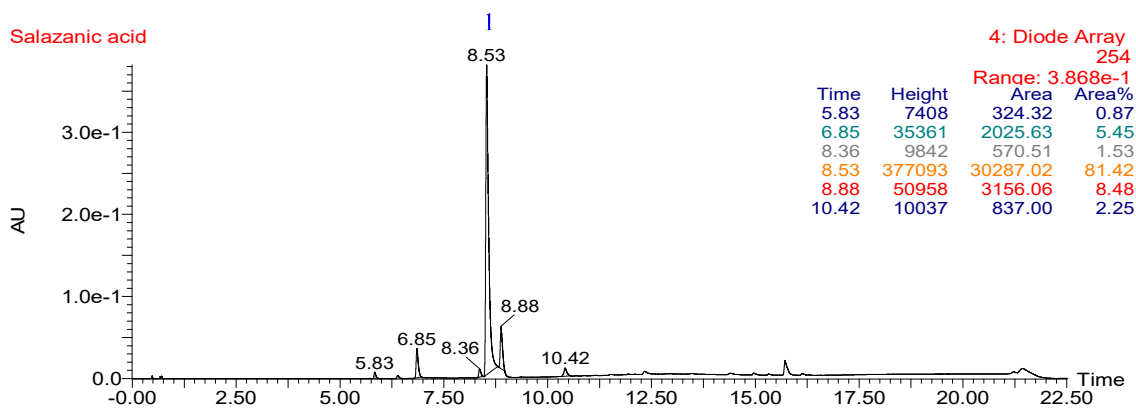

C)

Norlobaridone

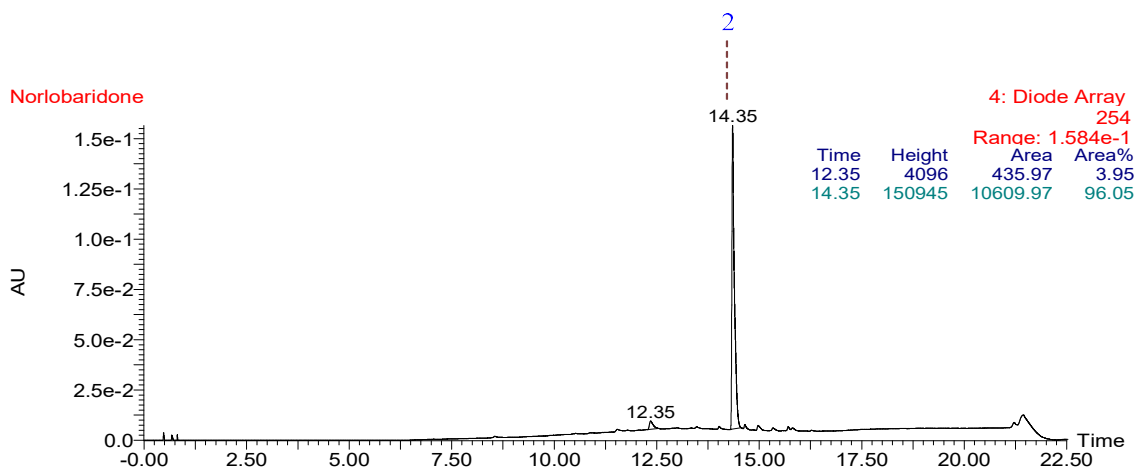

D)

Atranorin

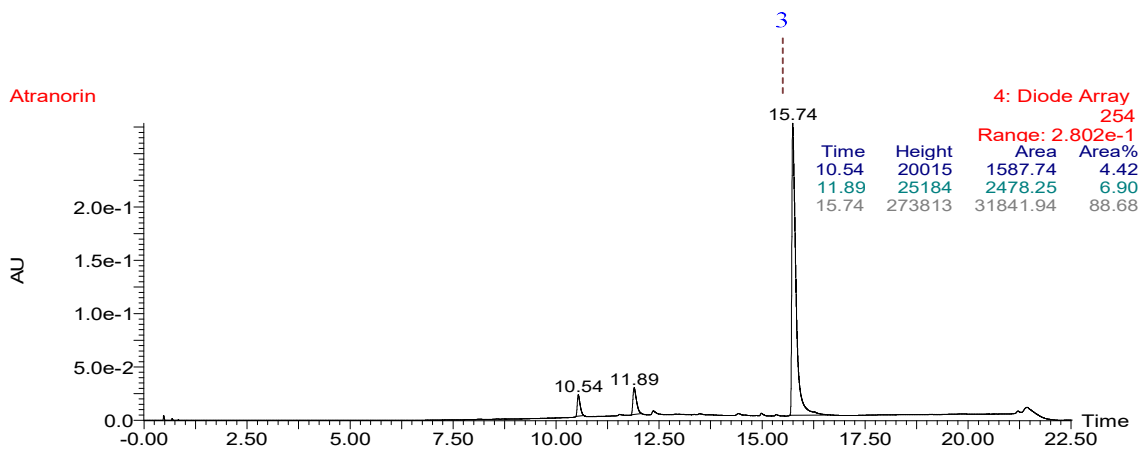

E)

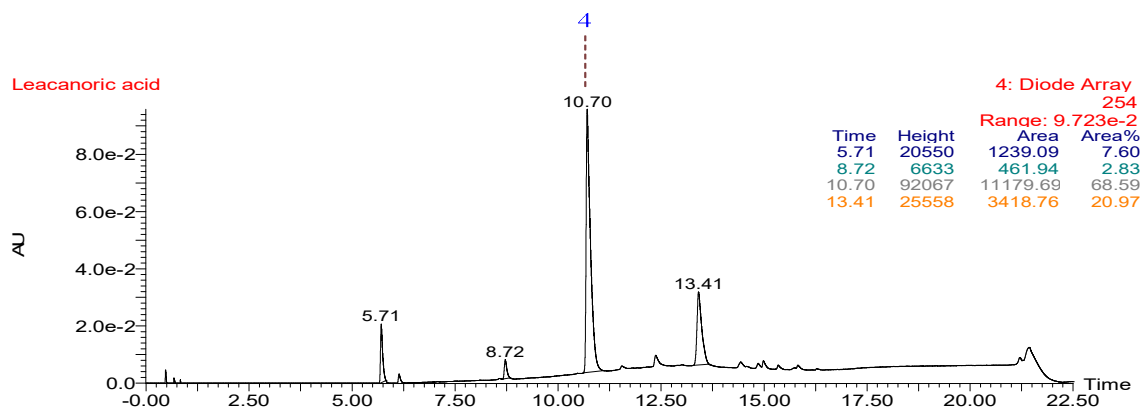

F)

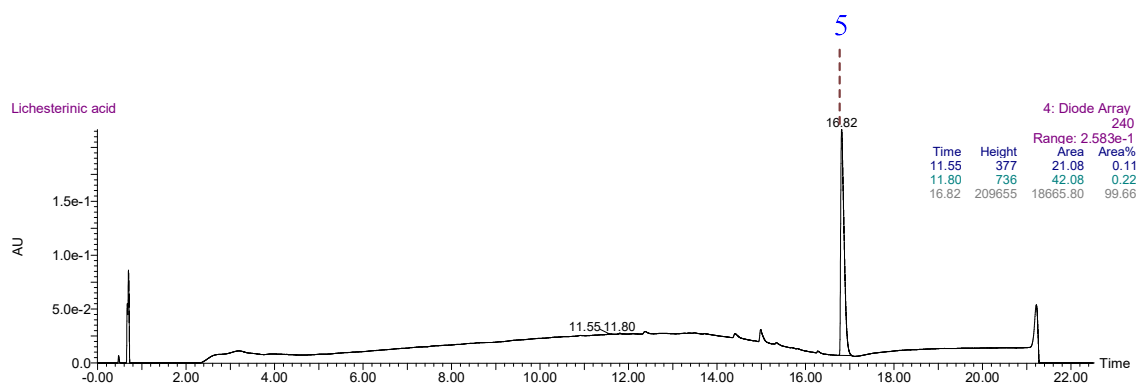

G)

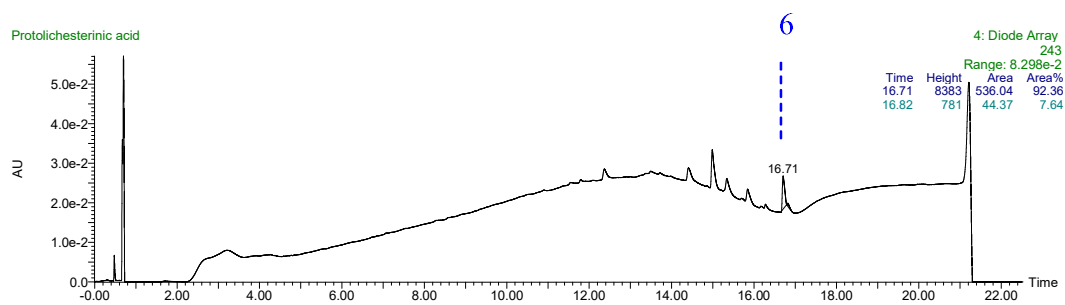

H)

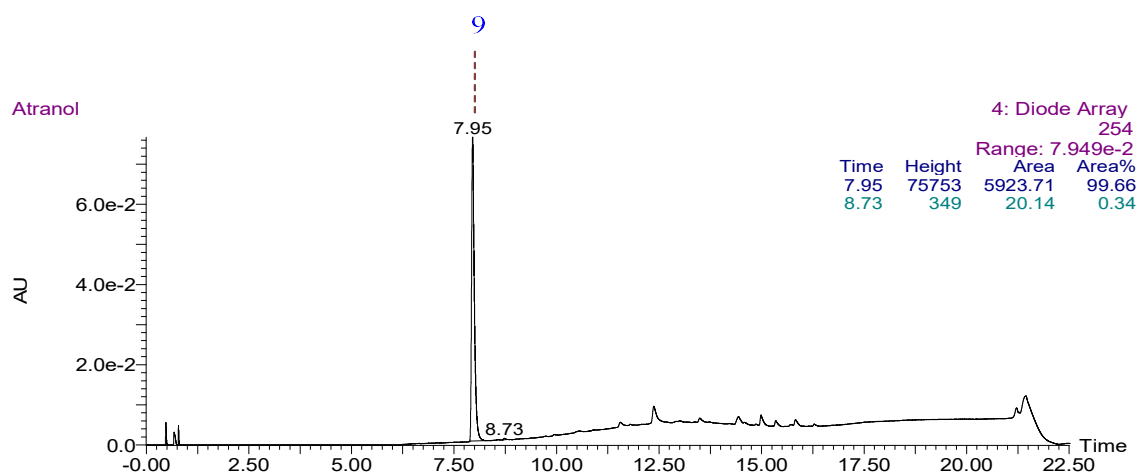

I)

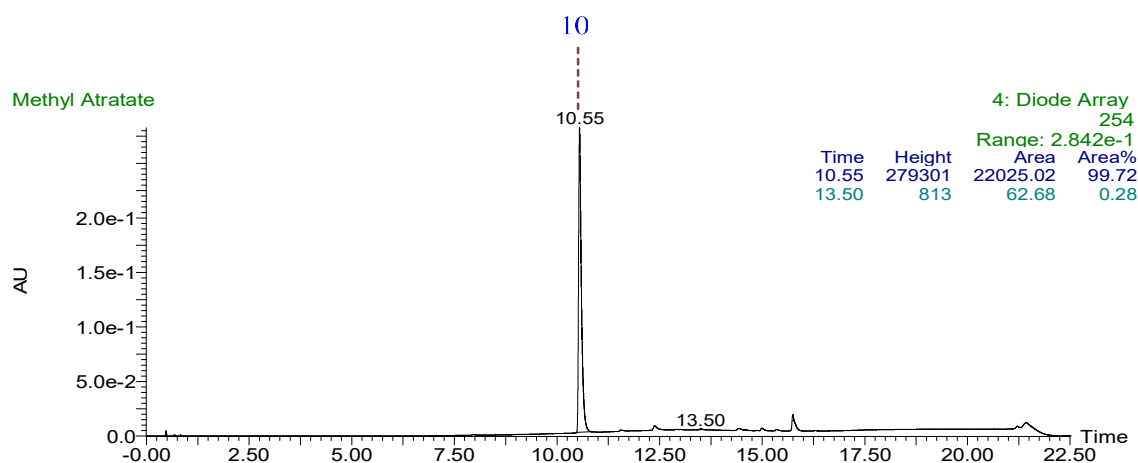

**Figure- S5:** Shows the Total Ion Chromatogram (TIC) acetone extract of *Hypotrachyna cirrhata* and pure compounds. A= Extract\* = Isolated compounds, & =identified ms/ms compounds; B=Compound 1; C=Compound 2; D= Compound 3; E= Compound 4; F = Compound 5; G = Compound 6; H = Compound 9; I = Compound 10;

|          |            |     |     |      |       |      |         |             |
|----------|------------|-----|-----|------|-------|------|---------|-------------|
| Minimum: |            |     |     | -1.5 |       |      |         |             |
| Maximum: | 5.0        | 5.0 |     | 50.0 |       |      |         |             |
| Mass     | Calc. Mass | mDa | PPM | DBE  | i-FIT | Norm | Conf(%) | Formula     |
| 387.0357 | 387.0352   | 0.5 | 1.3 | 13.5 | 863.6 | n/a  | n/a     | C18 H11 O10 |

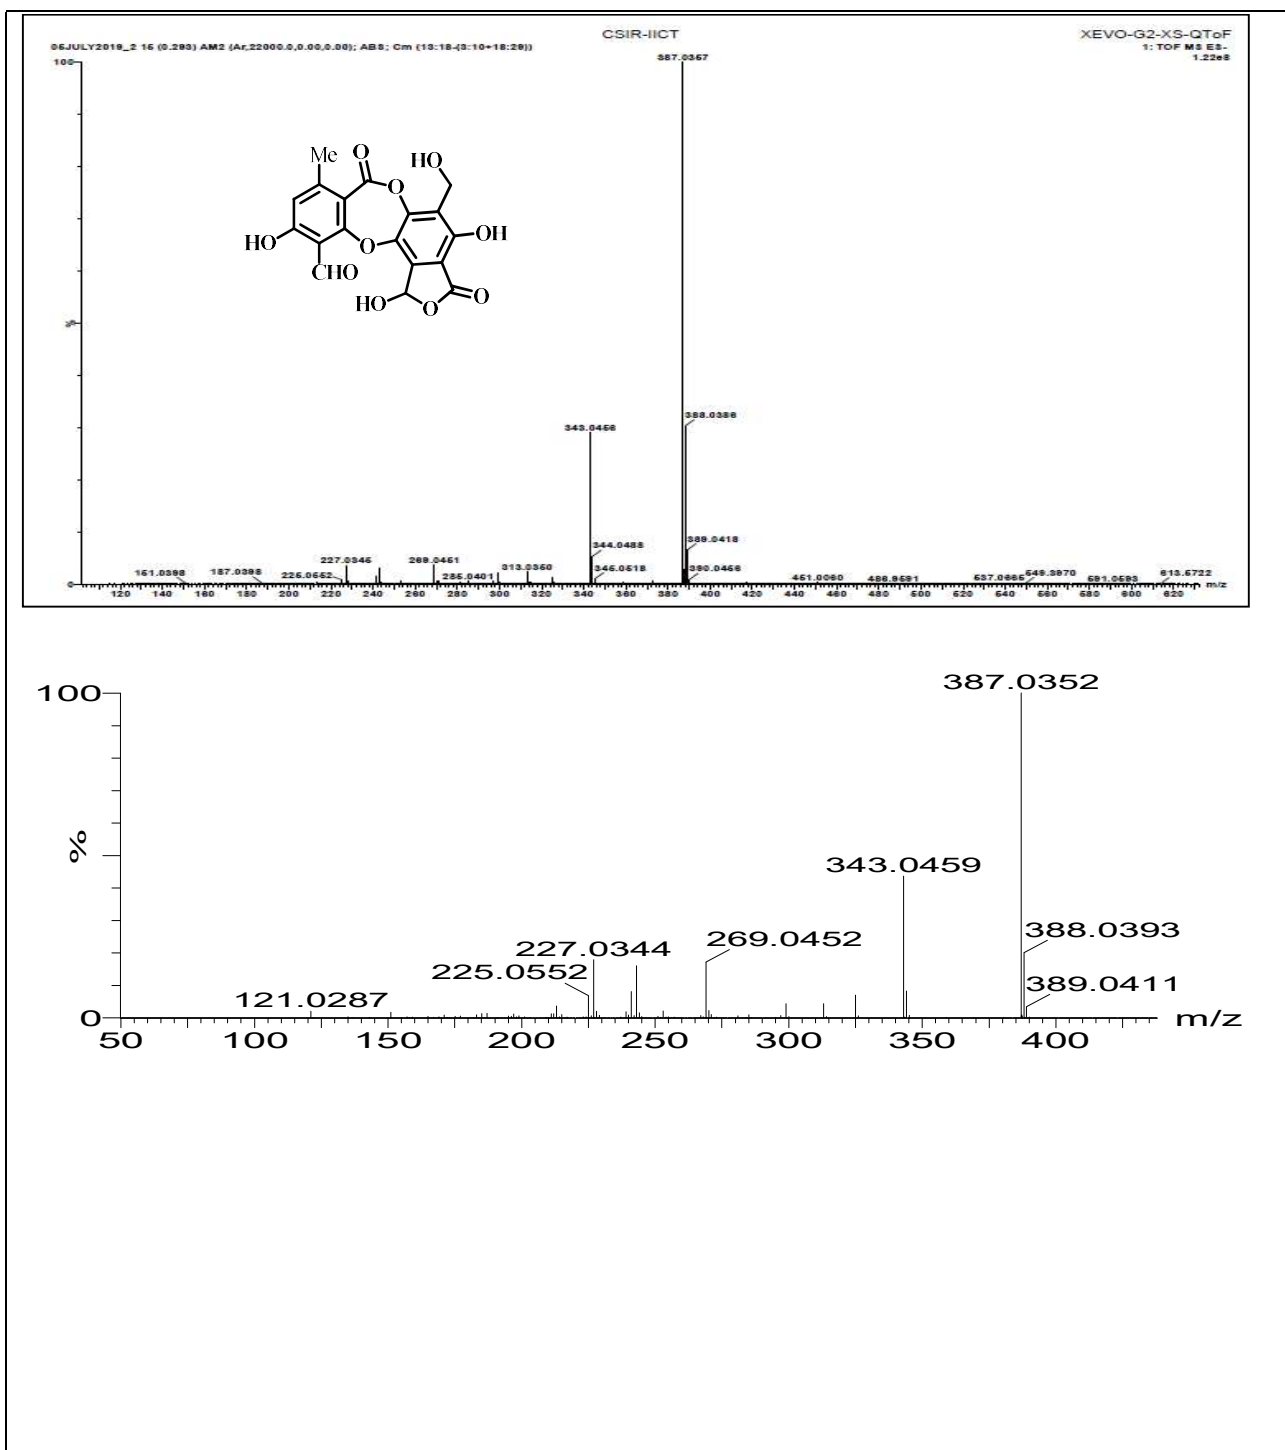

Figure- S6: HRESIMS, MS/MS spectra and fragmentation pattern of Salazinicacid (1)

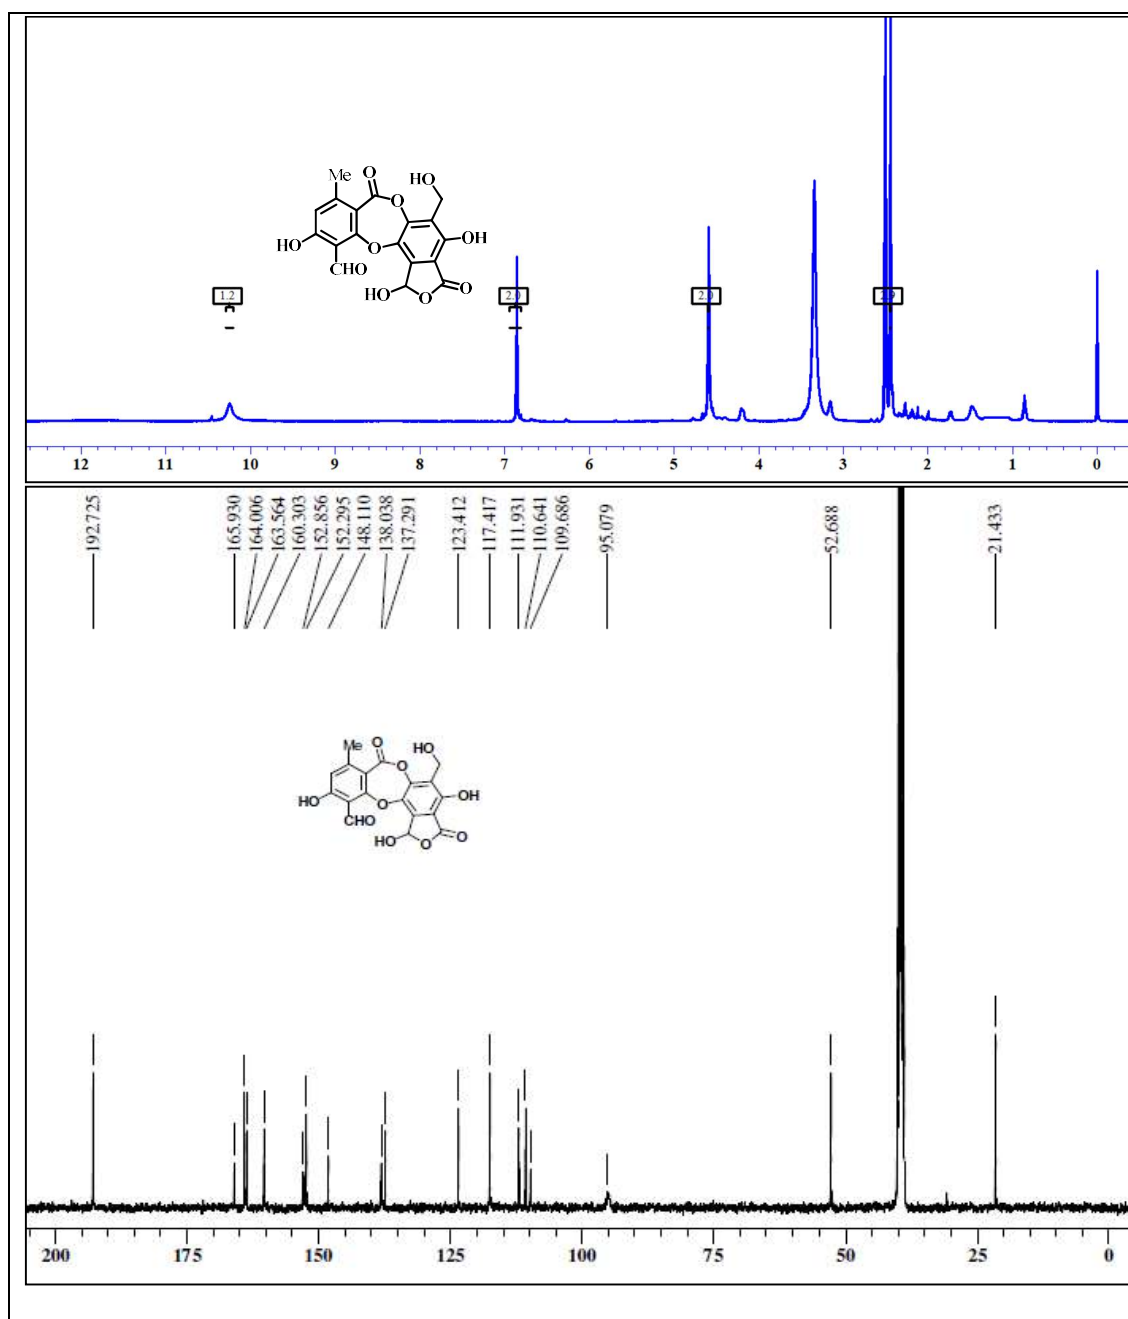

**Figure- S7:** <sup>1</sup>H & <sup>13</sup>C NMR spectrum of Salazinicacid (**11**) (500 & 100 MHz, DMSO-d<sub>6</sub>)

|          |            |      |      |      |       |      |         |            |  |
|----------|------------|------|------|------|-------|------|---------|------------|--|
| Minimum: |            |      |      | -1.5 |       |      |         |            |  |
| Maximum: | 5.0        | 5.0  | 50.0 |      |       |      |         |            |  |
| Mass     | Calc. Mass | mDa  | PPM  | DBE  | i-FIT | Norm | Conf(%) | Formula    |  |
| 397.1647 | 397.1651   | -0.4 | -1.0 | 11.5 | 865.0 | n/a  | n/a     | C23 H25 O6 |  |

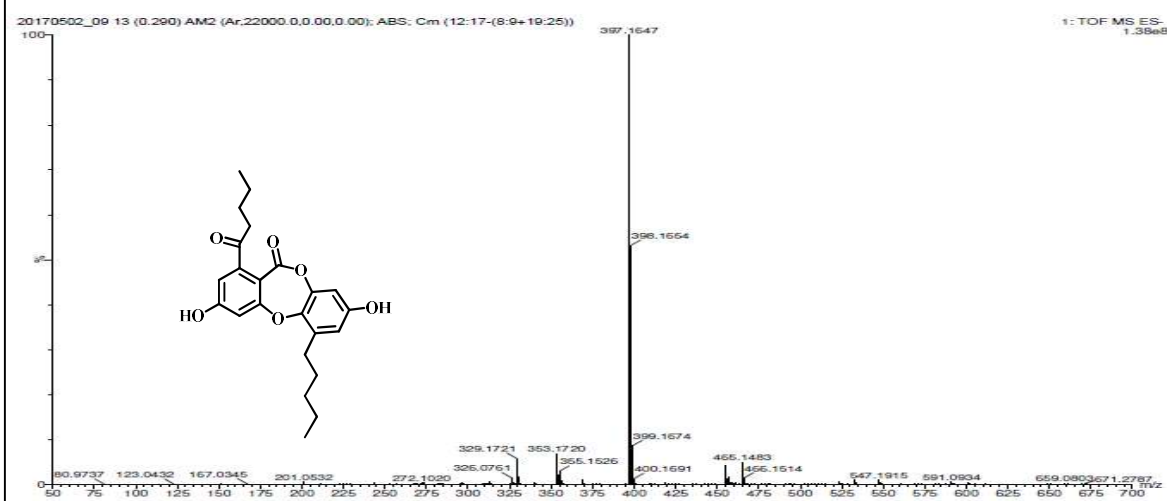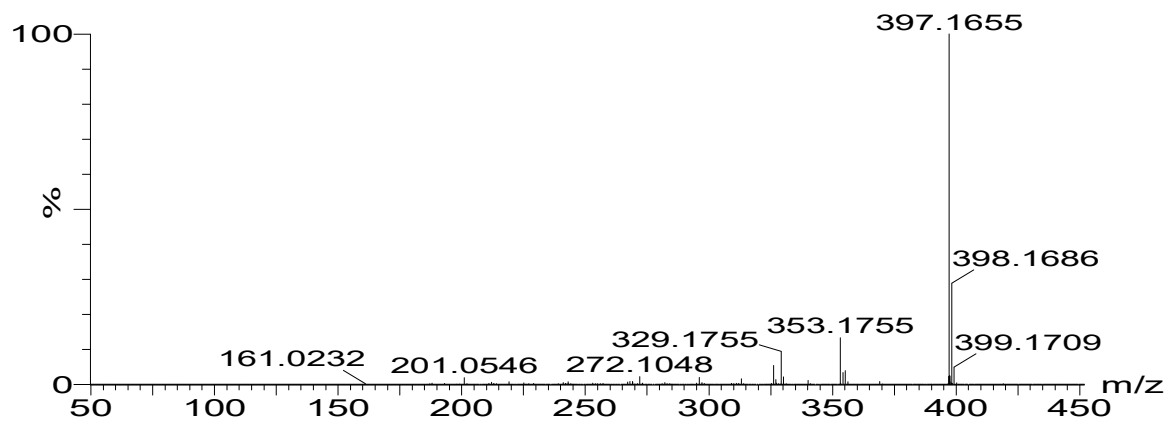

**Figure- S8:** HRESIMS, MS/MS spectra and fragmentation pattern of Norlobaridone (**12**)

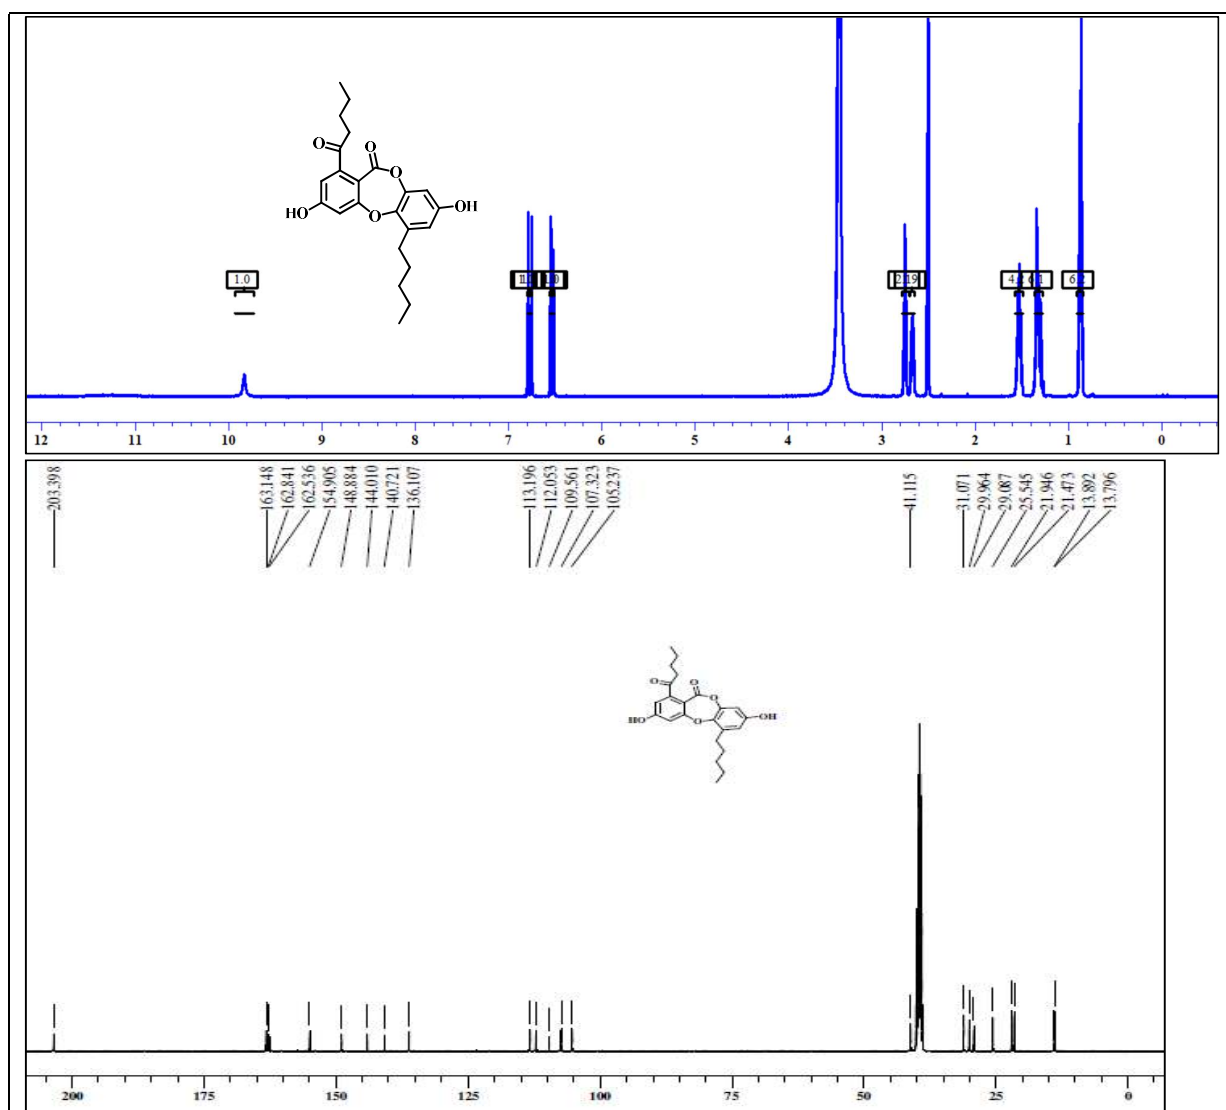

**Figure -S9:** <sup>1</sup>H & <sup>13</sup>C NMR Spectrum of Norlobaridone (**12**) (500 & 100 MHz, DMSO-d<sub>6</sub>)

|          |            |     |     |      |       |      |         |                                                |  |
|----------|------------|-----|-----|------|-------|------|---------|------------------------------------------------|--|
| Minimum: |            |     |     | -1.5 |       |      |         |                                                |  |
| Maximum: | 5.0        | 5.0 |     | 50.0 |       |      |         |                                                |  |
| Mass     | Calc. Mass | mDa | PPM | DBE  | i-FIT | Norm | Conf(%) | Formula                                        |  |
| 373.0927 | 373.0923   | 0.4 | 1.1 | 11.5 | 666.3 | n/a  | n/a     | C <sub>19</sub> H <sub>17</sub> O <sub>8</sub> |  |

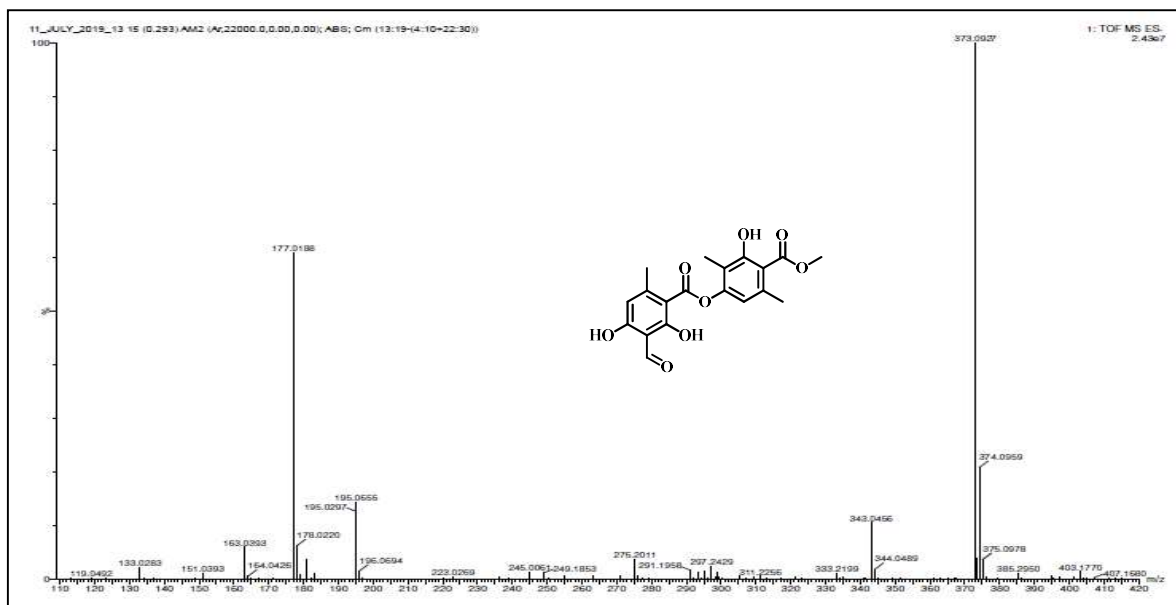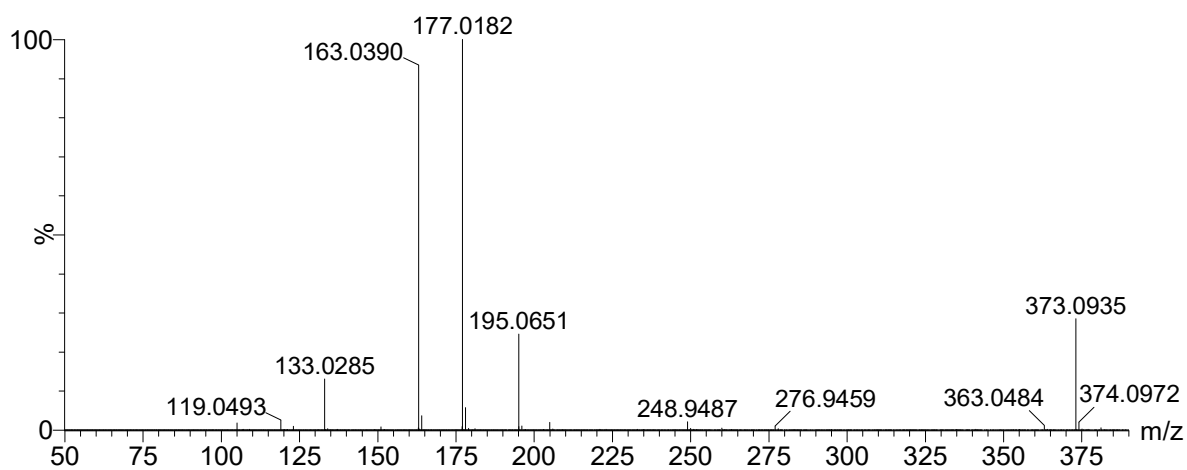

Figure -S10: HRESIMS, MS/MS spectra and fragmentation pattern of Atranorin (**13**)

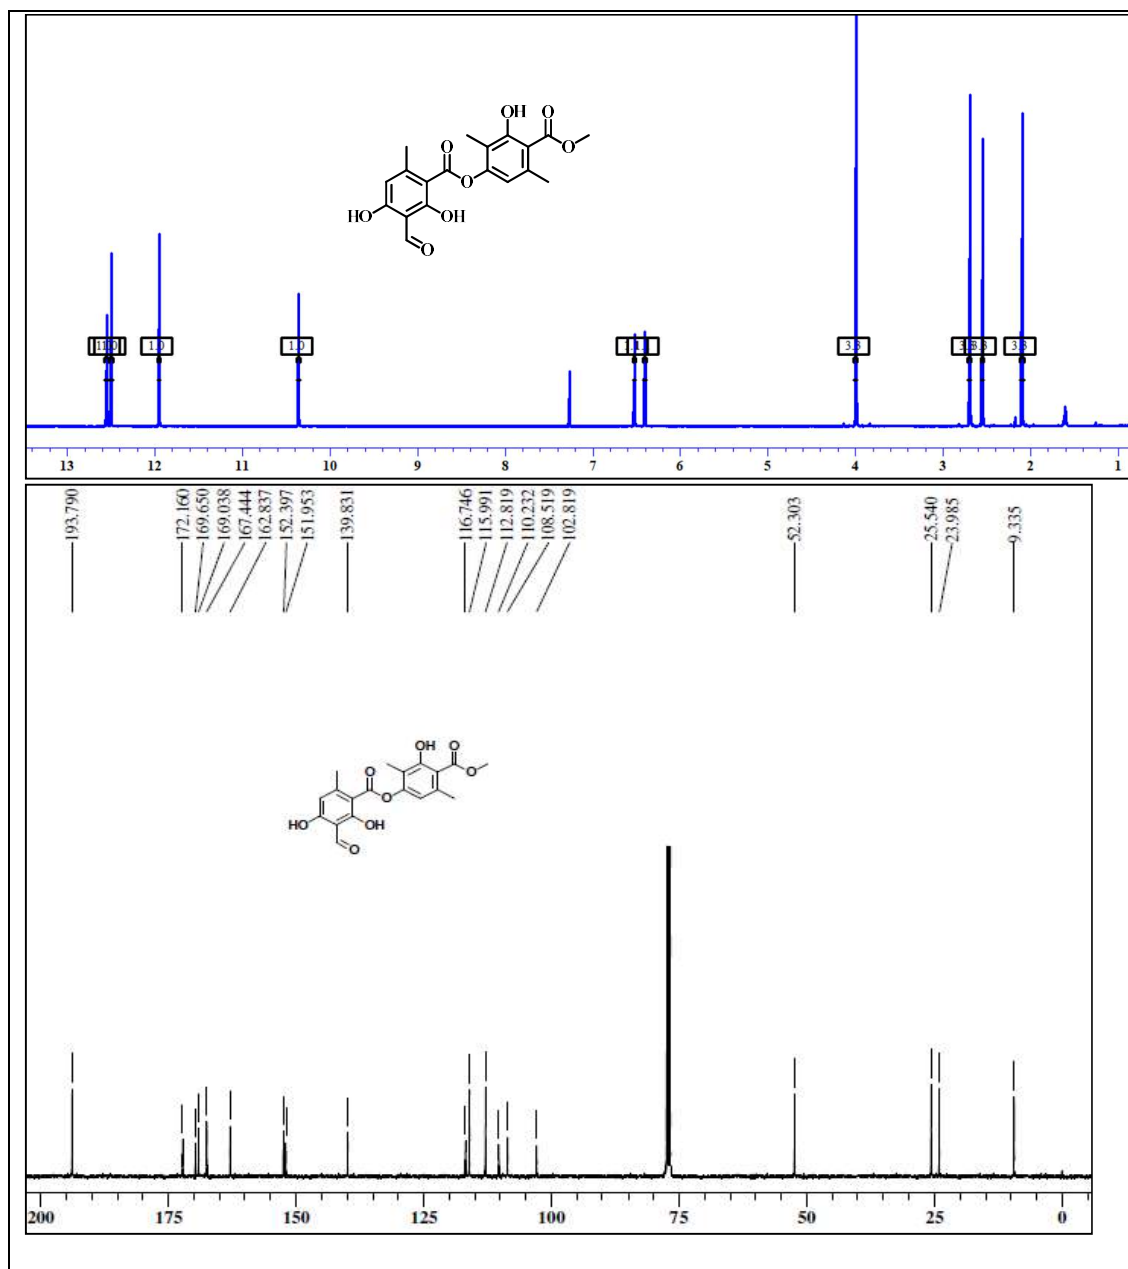

**Figure -S11:** <sup>1</sup>H & <sup>13</sup>C NMR Spectrum of Atranorin (**13**) (500 & 100 MHz, CDCl<sub>3</sub>)

|          |            |     |      |      |       |      |          |                                                |  |
|----------|------------|-----|------|------|-------|------|----------|------------------------------------------------|--|
| Minimum: |            |     |      | -1.5 |       |      |          |                                                |  |
| Maximum: | 5.0        | 5.0 | 50.0 |      |       |      |          |                                                |  |
| Mass     | Calc. Mass | mDa | PPM  | DBE  | i-FIT | Norm | Conf (%) | Formula                                        |  |
| 317.0667 | 317.0661   | 0.6 | 1.9  | 10.5 | 245.3 | n/a  | n/a      | C <sub>16</sub> H <sub>13</sub> O <sub>7</sub> |  |

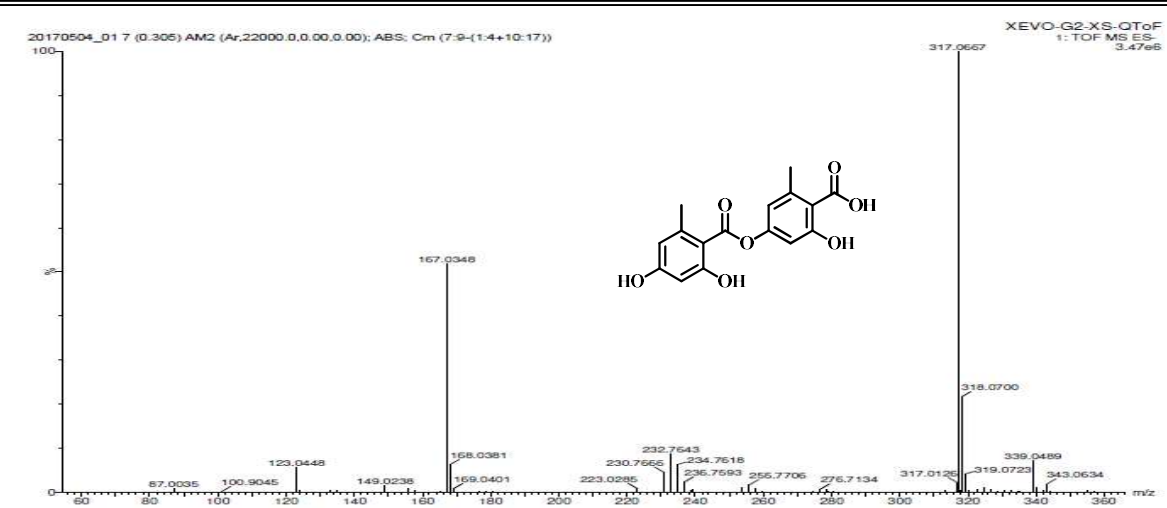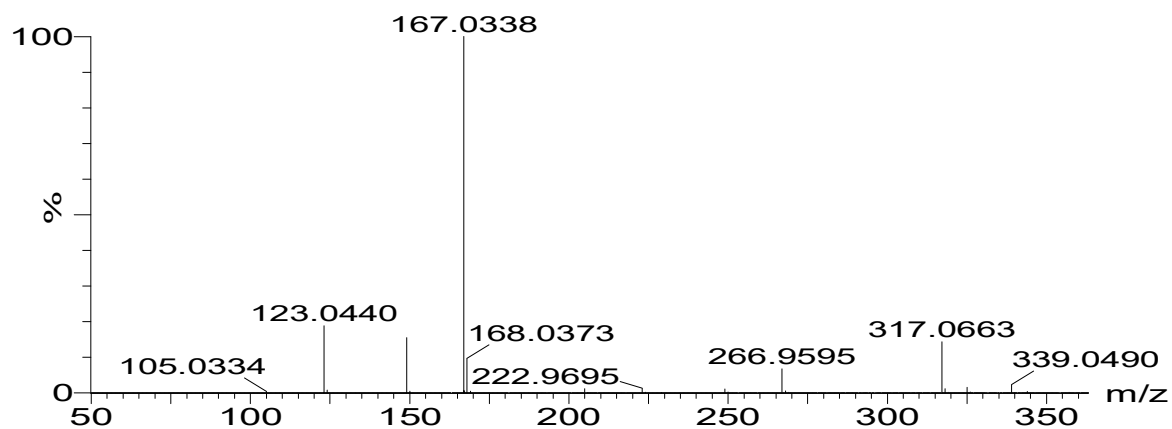

**Figure- S12:** HRESIMS, MS/MS spectra and fragmentation pattern of Lecanoric acid (**14**)

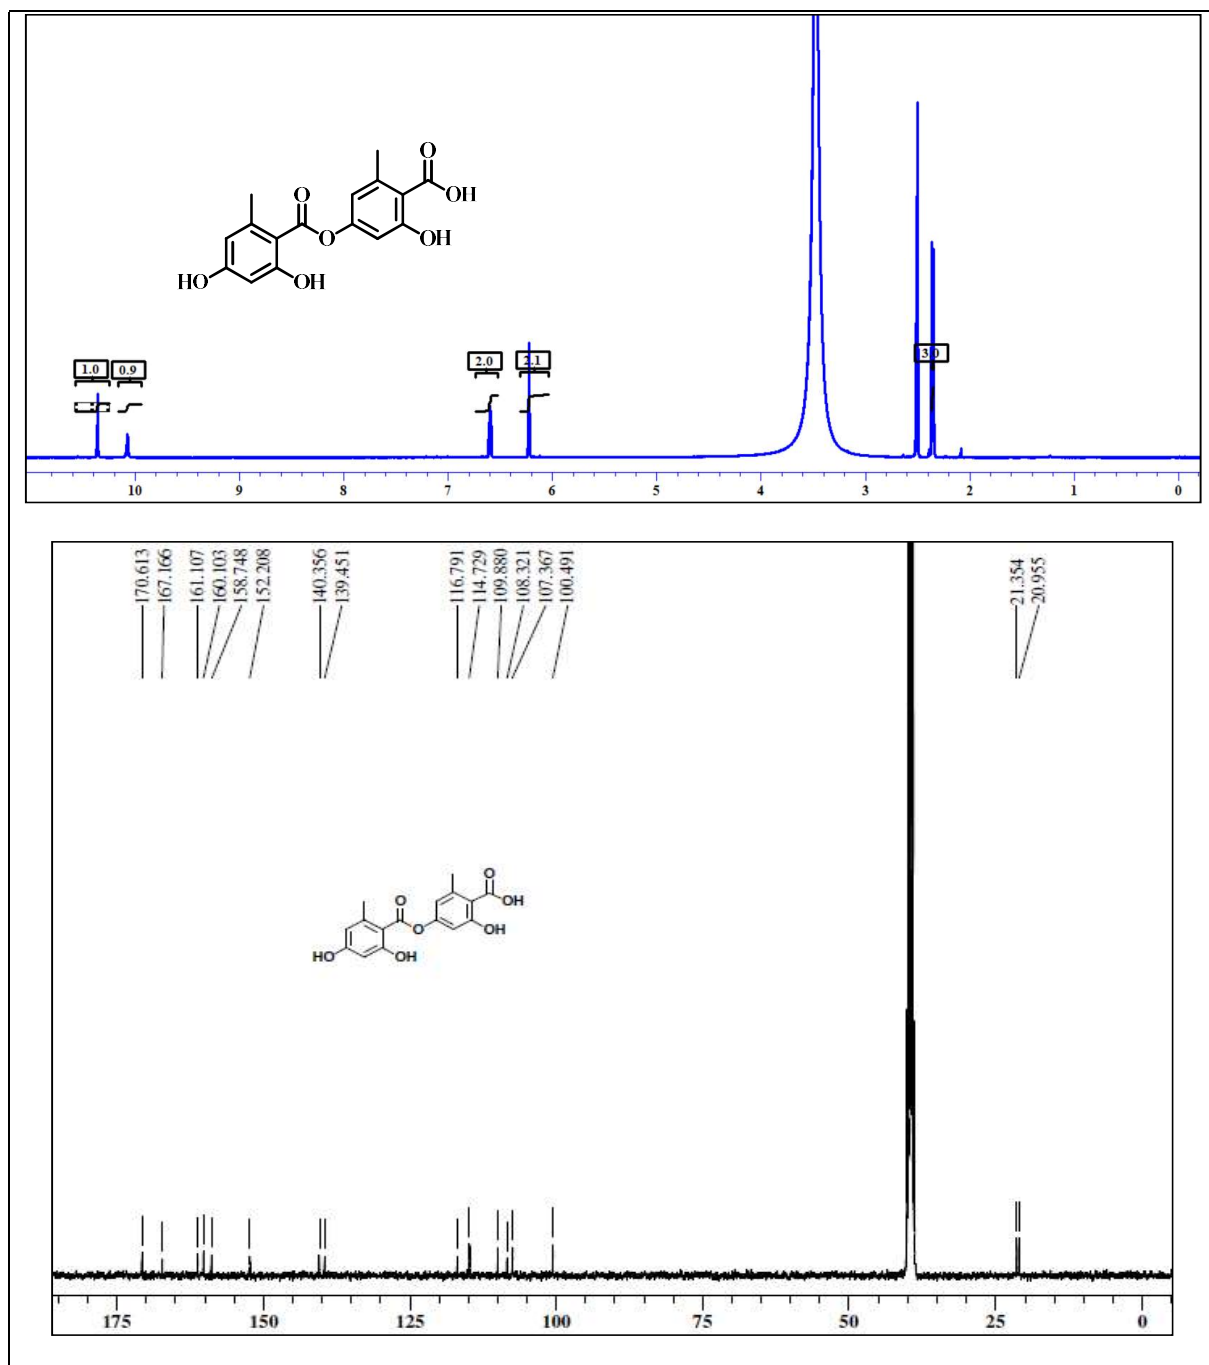

**Figure -S13:**  $^1\text{H}$  &  $^{13}\text{C}$  NMR Spectrum of Lecanoric acid (**14**) (500 & 125 MHz, DMSO- $\text{d}_6$ )

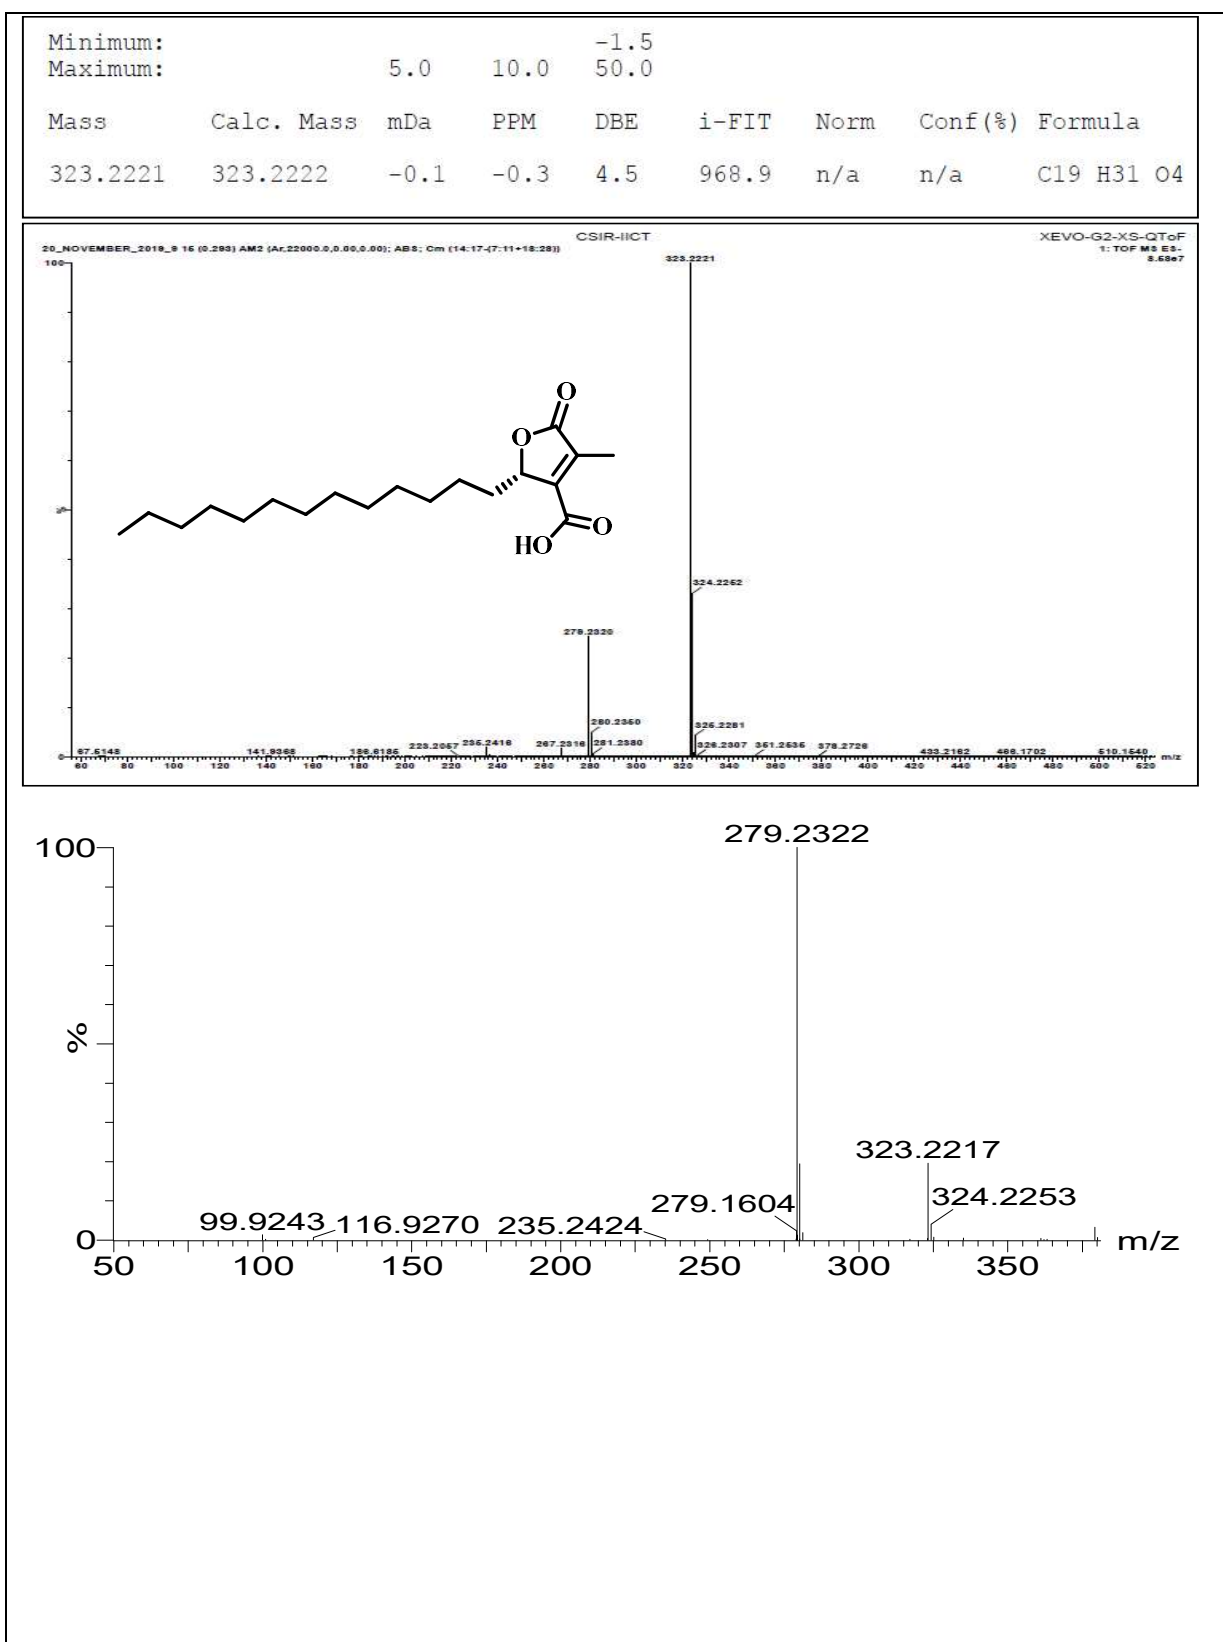

**Figure -S14:** HRESIMS, MS/MS spectra and fragmentation pattern of Lichesterinic acid (15)

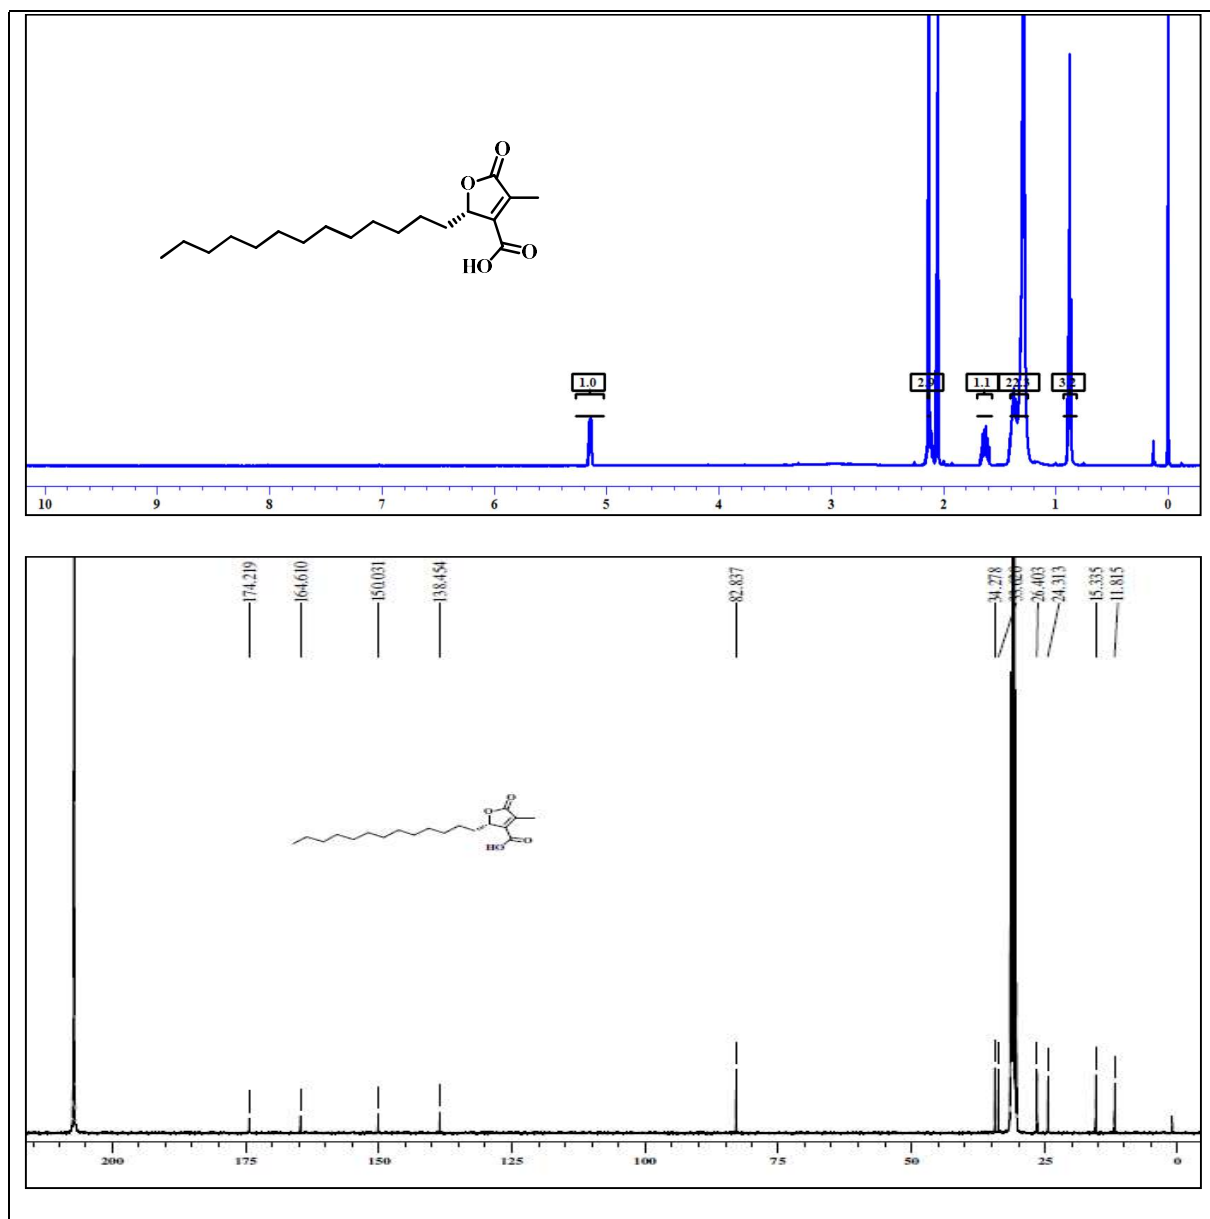

**Figure -S15:**  $^1\text{H}$  &  $^{13}\text{C}$  NMR spectrum of Lichesterinic acid (**15**) (400 & 100 MHz,  $\text{CD}_3\text{COCD}_3$ )

|          |            |      |      |      |       |      |          |            |  |
|----------|------------|------|------|------|-------|------|----------|------------|--|
| Minimum: |            |      |      | -1.5 |       |      |          |            |  |
| Maximum: | 5.0        | 10.0 | 50.0 |      |       |      |          |            |  |
| Mass     | Calc. Mass | mDa  | PPM  | DBE  | i-FIT | Norm | Conf (%) | Formula    |  |
| 323.2223 | 323.2222   | 0.1  | 0.3  | 4.5  | 914.9 | n/a  | n/a      | C19 H31 O4 |  |

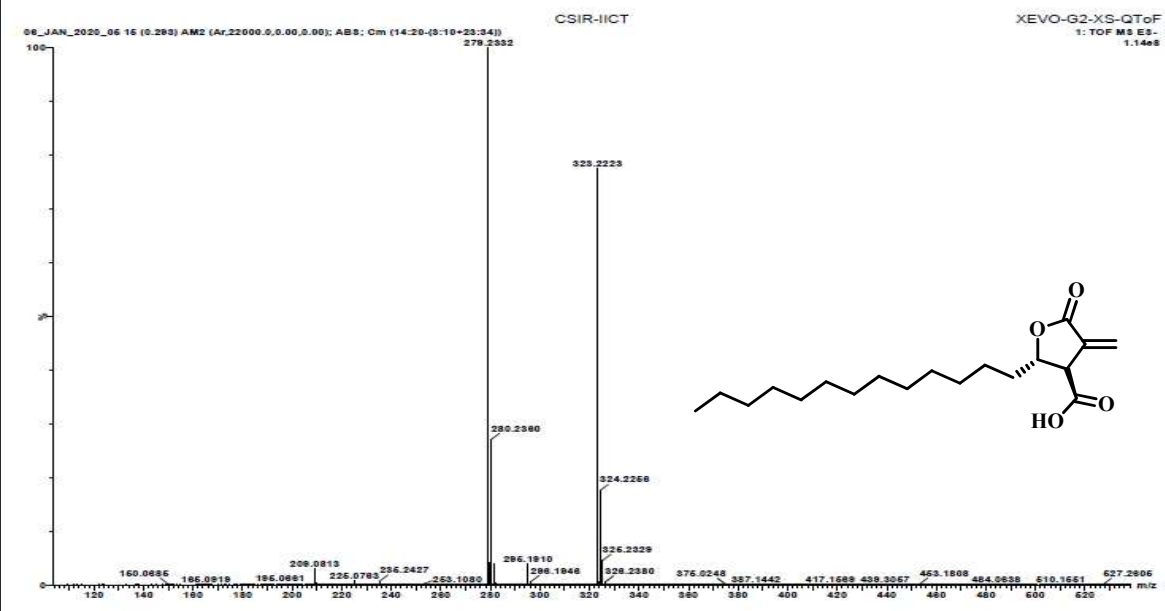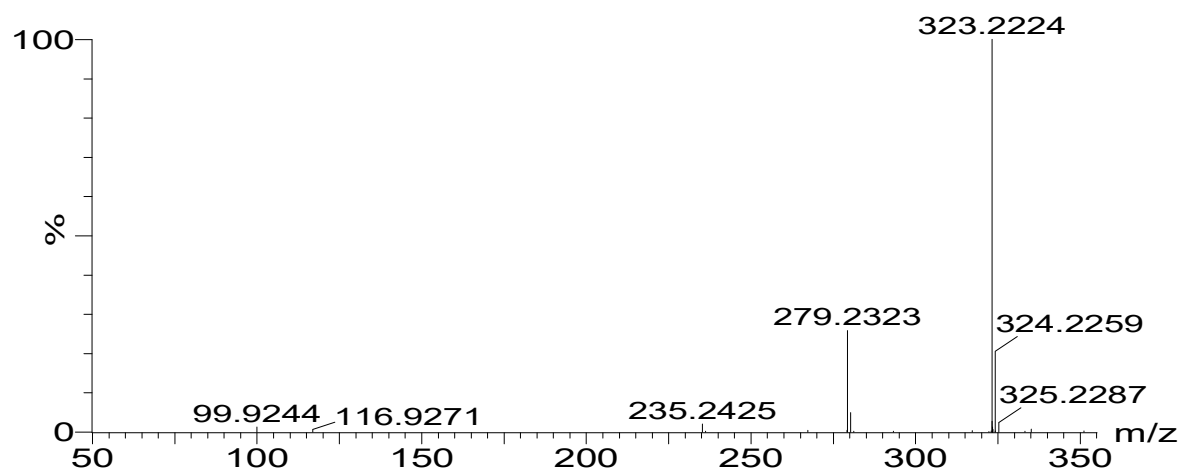

**Figure -S16:** HRESIMS, MS/MS spectra and fragmentation pattern of Protolichesterinic acid (16)

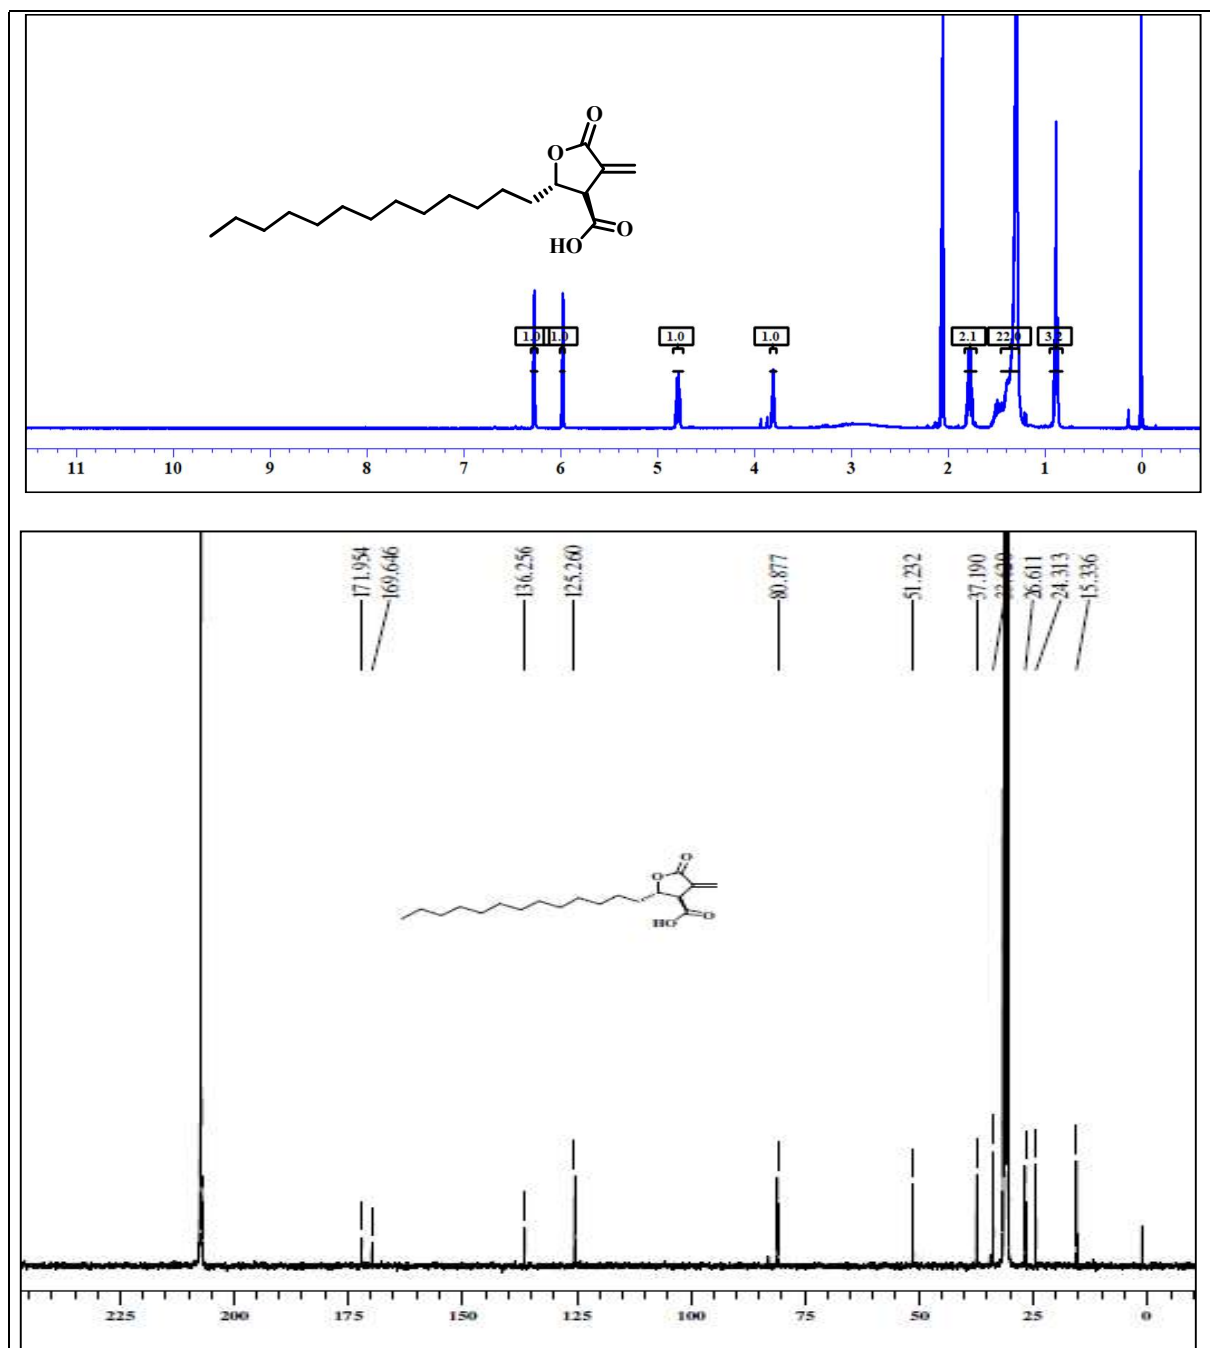

**Figure- S17:**  $^1\text{H}$  &  $^{13}\text{C}$  NMR spectrum of Protolichesterinic acid (**16**) (400 & 100 MHz,  $\text{CD}_3\text{COCD}_3$ )

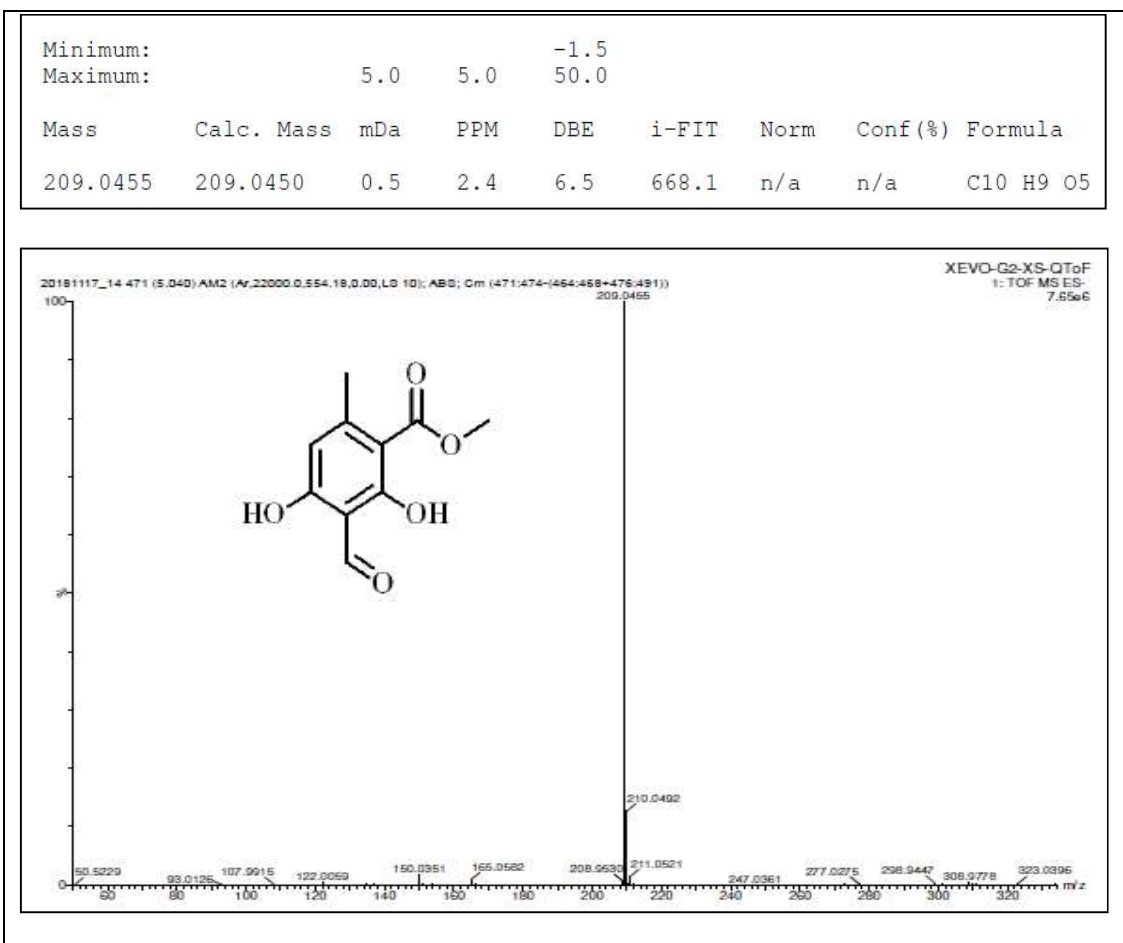

**Figure- S18:** HRESIMS Spectrum of Methyl hematommate (**17**)

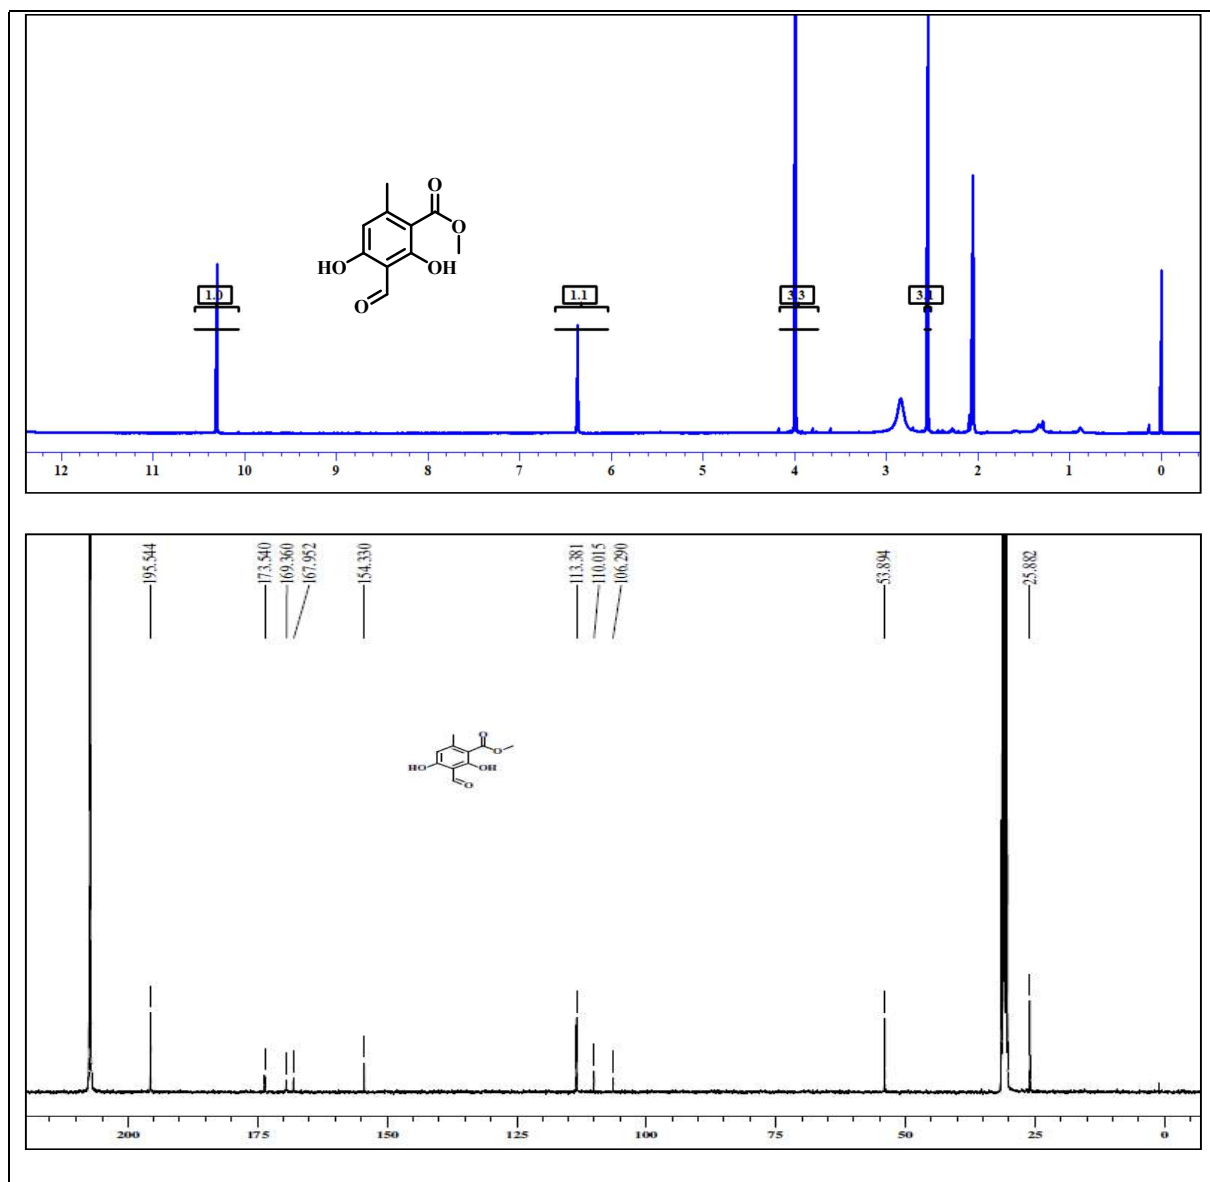

**Figure S19:**  $^1\text{H}$  &  $^{13}\text{C}$  NMR Spectrum of Methyl hematommate (17) (400 & 100 MHz, Acetone- $\text{d}_6$ )

|          |            |     |      |      |       |      |         |            |
|----------|------------|-----|------|------|-------|------|---------|------------|
| Minimum: |            |     |      | -1.5 |       |      |         |            |
| Maximum: | 5.0        | 5.0 | 50.0 |      |       |      |         |            |
| Mass     | Calc. Mass | mDa | PPM  | DBE  | i-FIT | Norm | Conf(%) | Formula    |
| 195.0658 | 195.0657   | 0.1 | 0.5  | 5.5  | 428.4 | n/a  | n/a     | C10 H11 O4 |

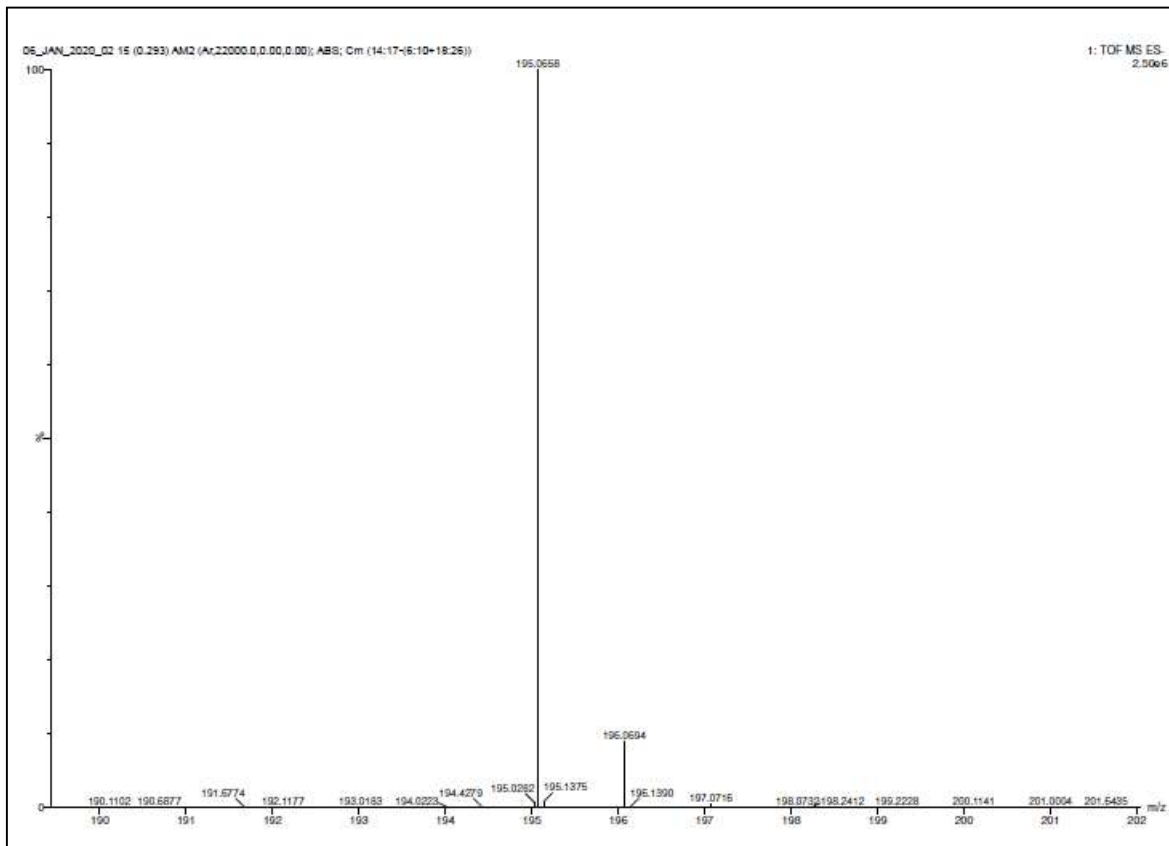

**Figure -S20:** HRESIMS Spectrum of Iso-rhizonic acid, 2-Methoxy-3, 6-dimethyl-4-Hydroxybenzoic acid (**18**)

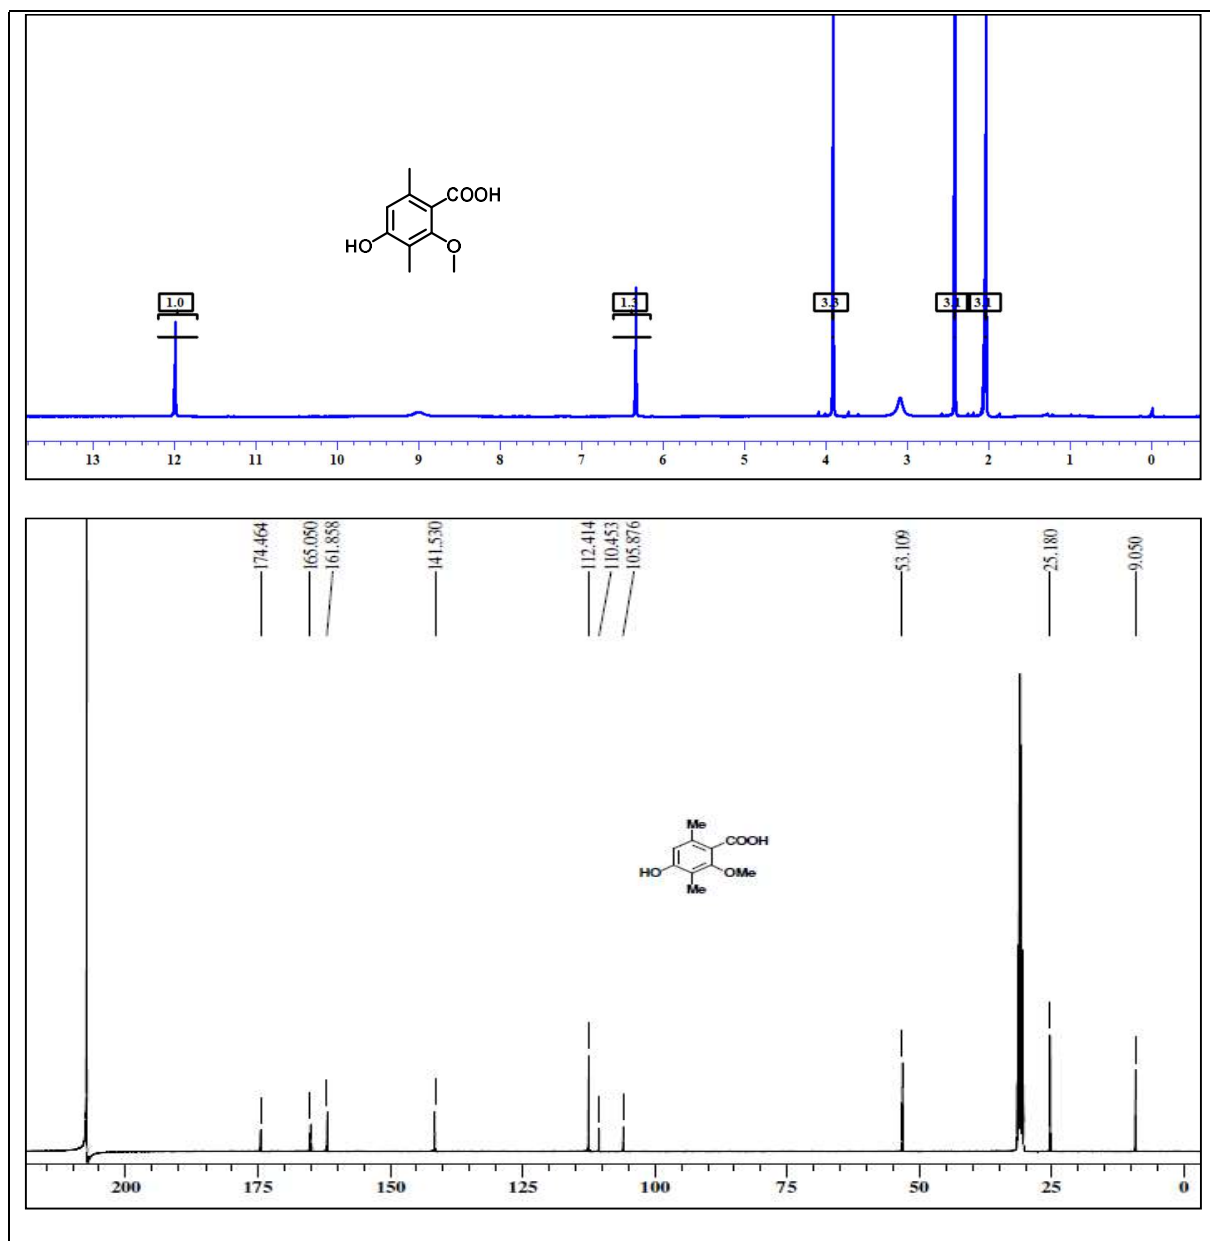

**Figure- S21:**  $^1\text{H}$  &  $^{13}\text{C}$  NMR Spectrum of Iso-rhizonic acid, 2-Methoxy-3,6-dimethyl-4-Hydroxybenzoic acid (**18**) (400 & 100 MHz, Acetone- $\text{d}_6$ )

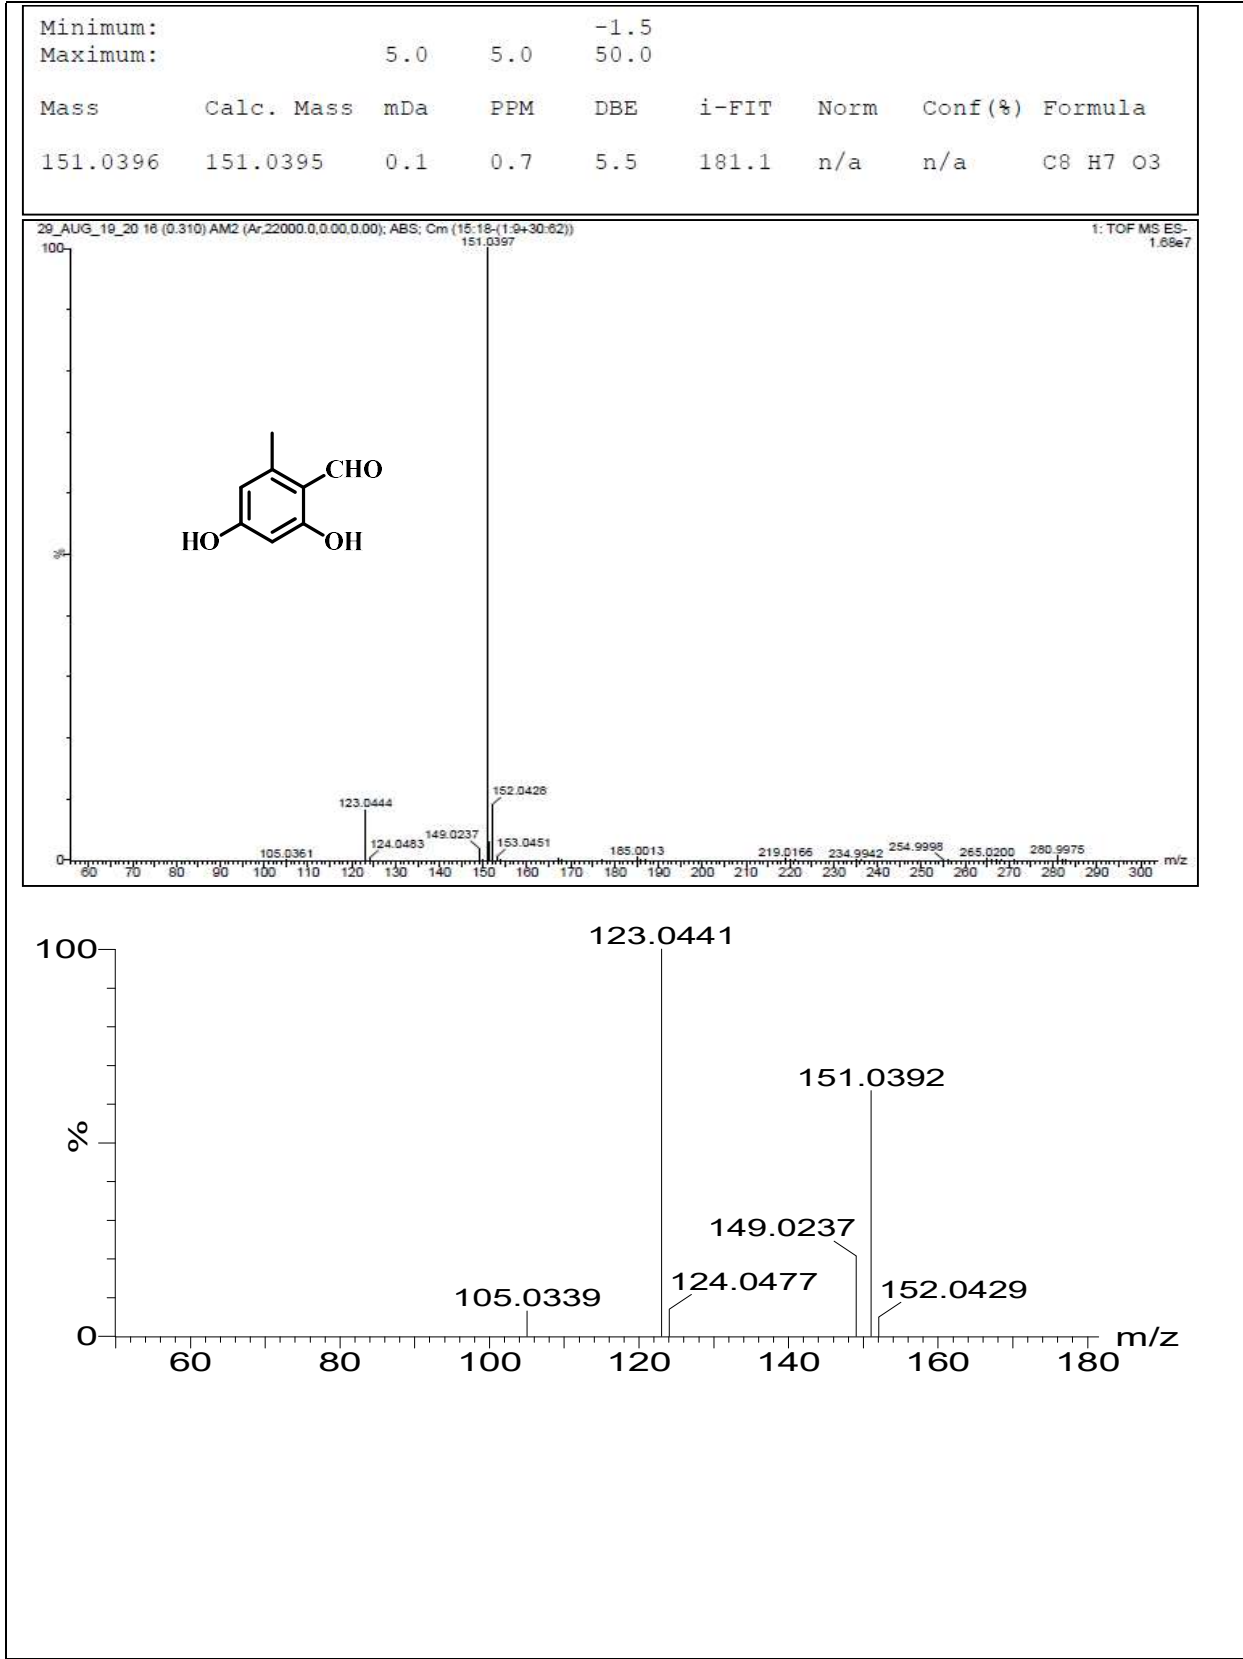

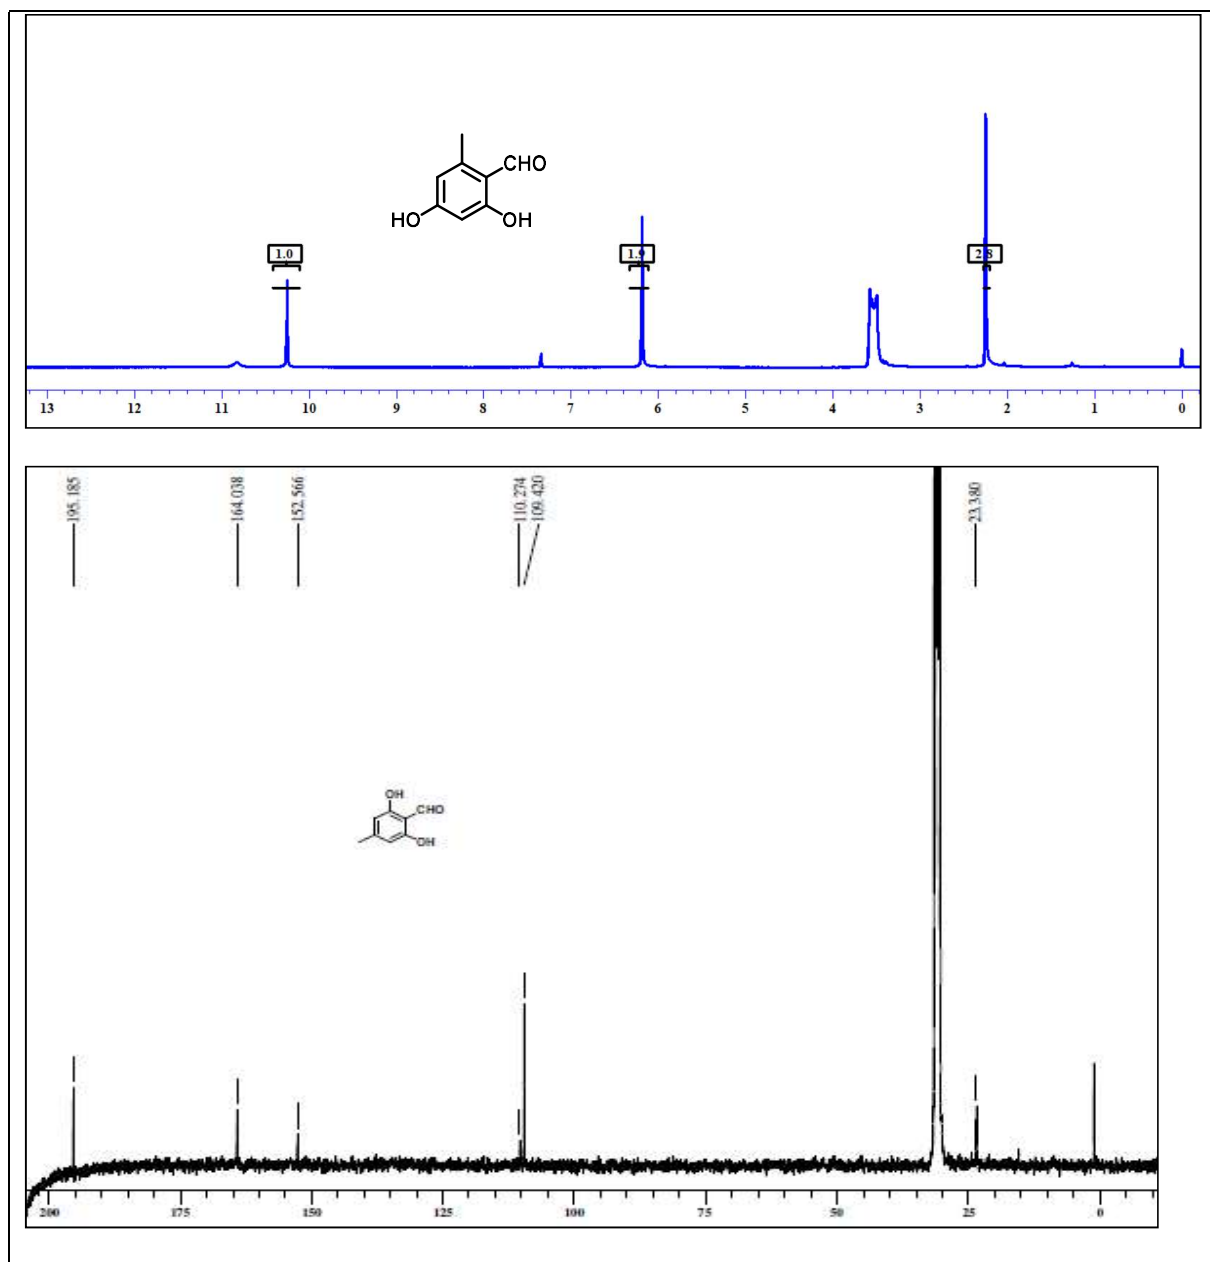

**Figure -S23:**  $^1\text{H}$  &  $^{13}\text{C}$  NMR Spectrum of Atranol (**19**) (300 & 75 MHz, Acetone- $\text{d}_6$ )

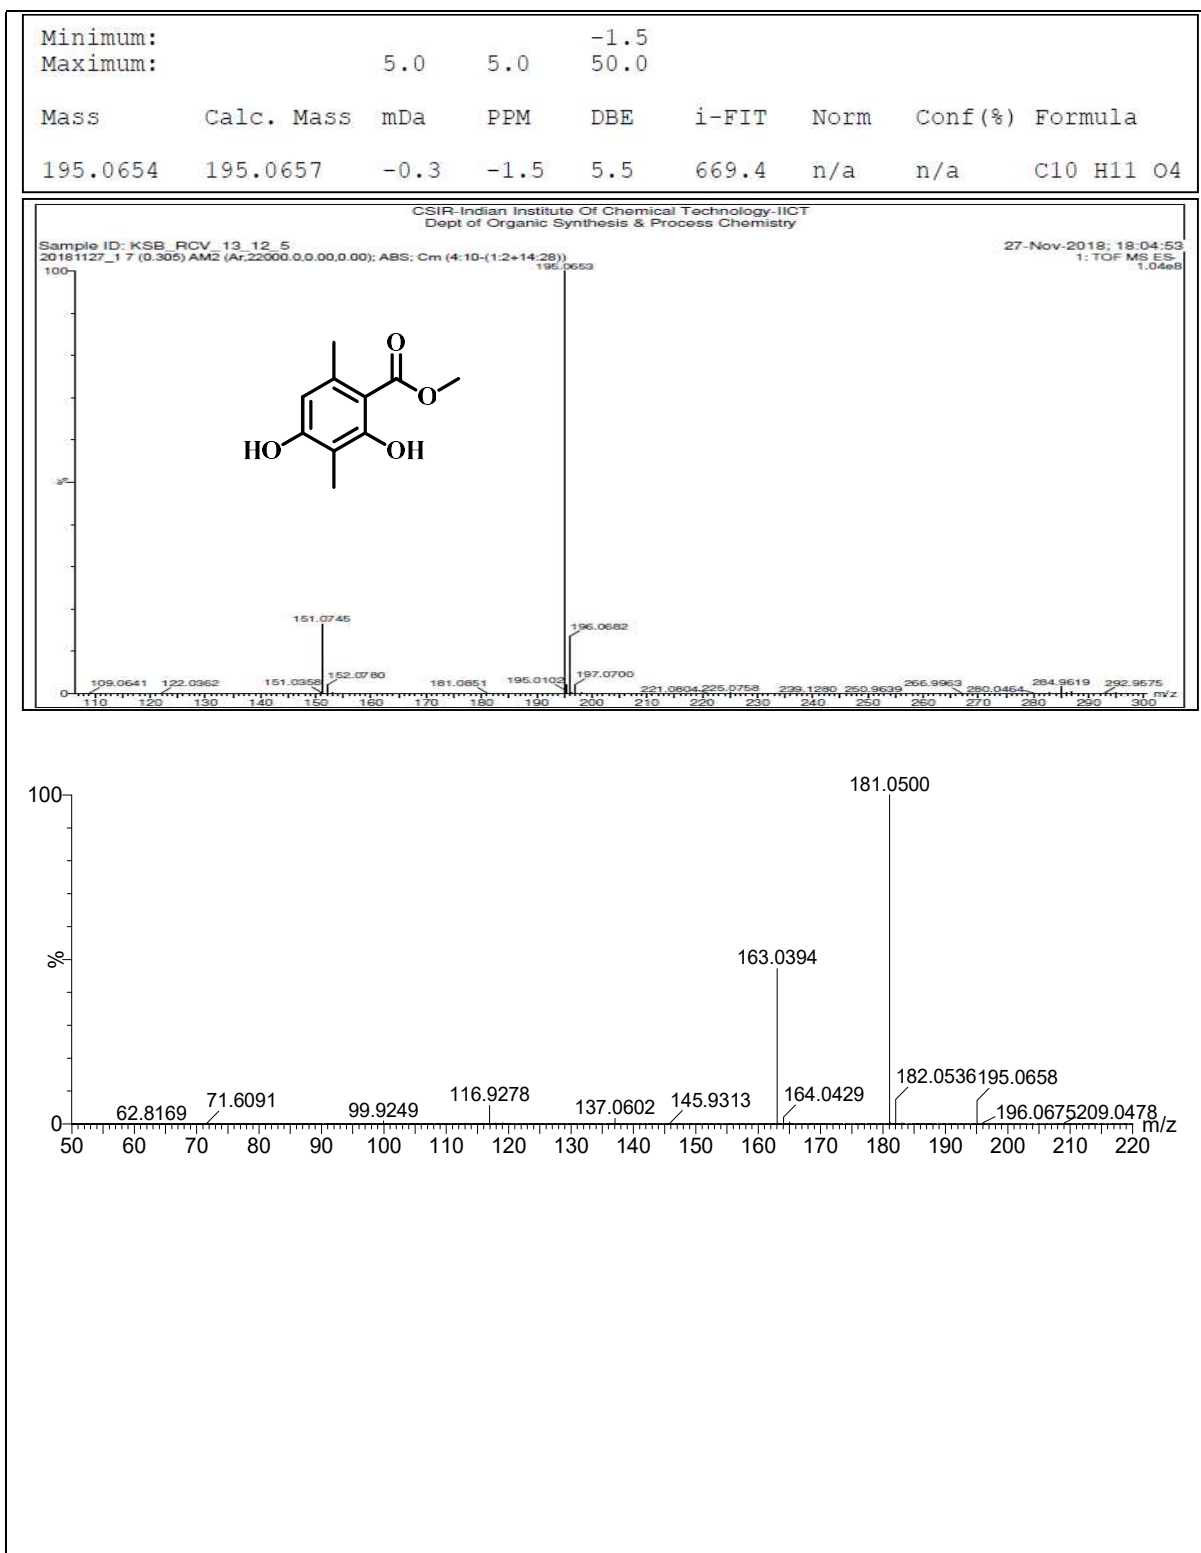

**Figure -S24:** HRESIMS, MS/MS spectra and fragmentation pattern of Methyl atratate (20)

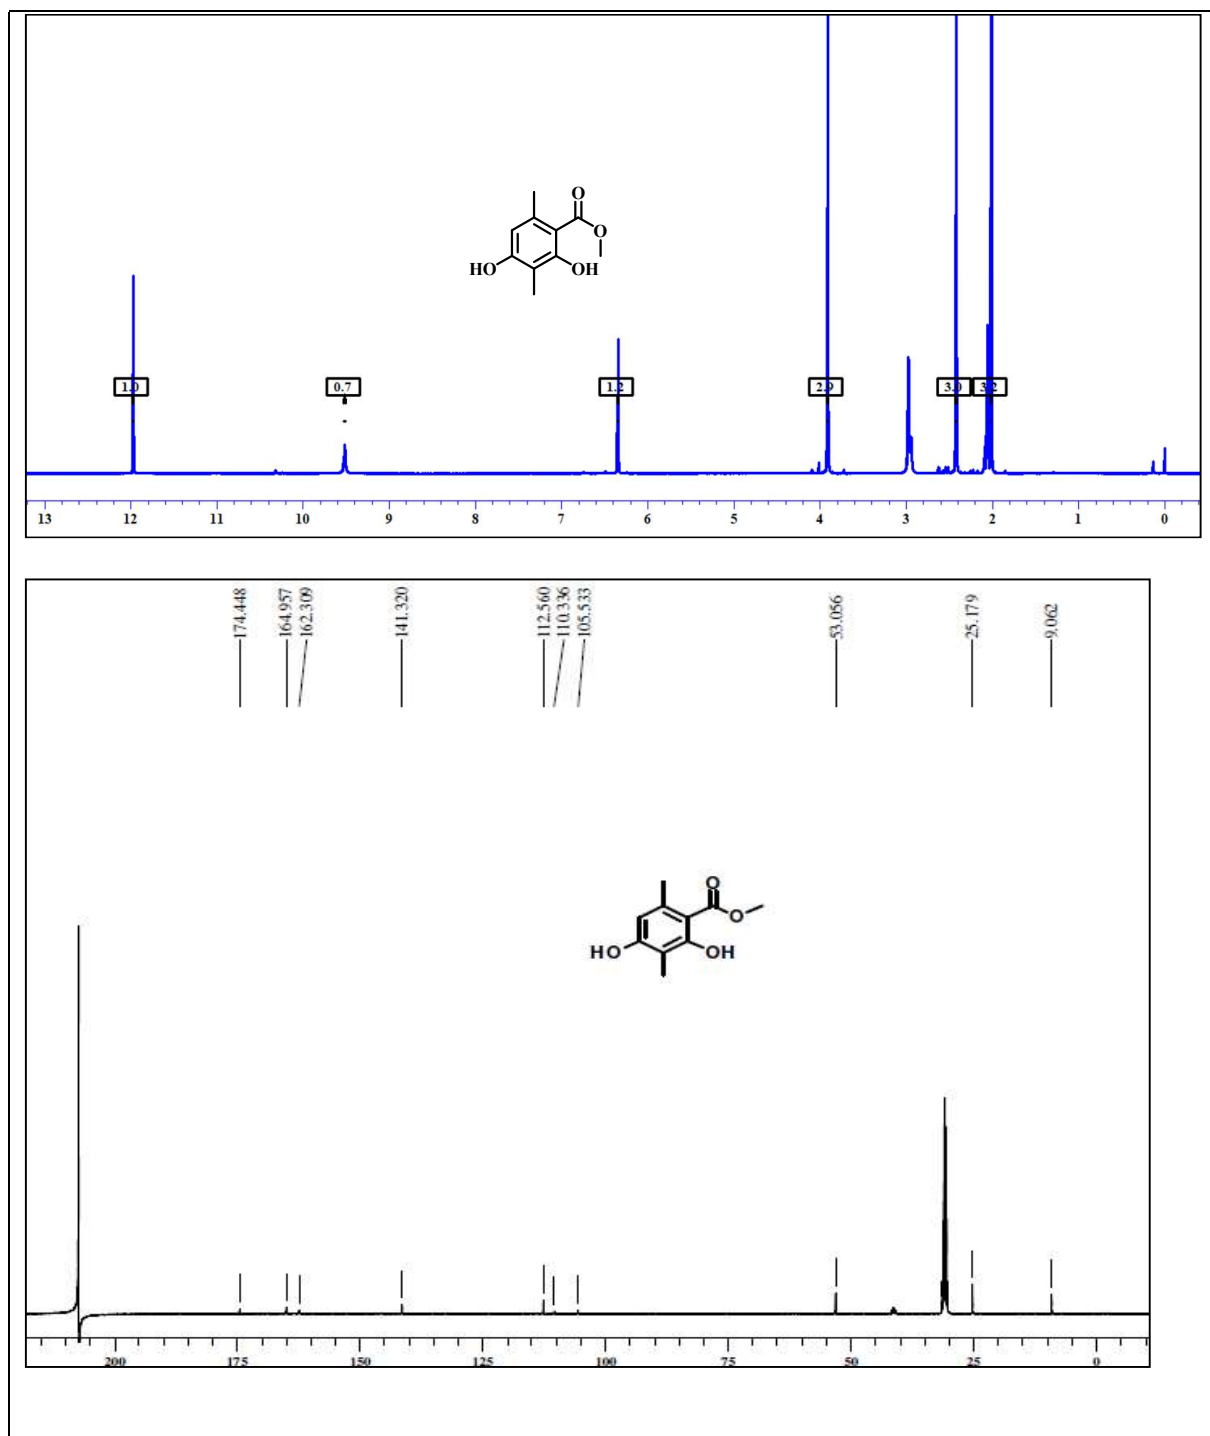

**Figure- S25:** <sup>1</sup>H & <sup>13</sup>C NMR Spectrum of Methyl atratate (**20**) (400 & 100 MHz, Acetone-d<sub>6</sub>)

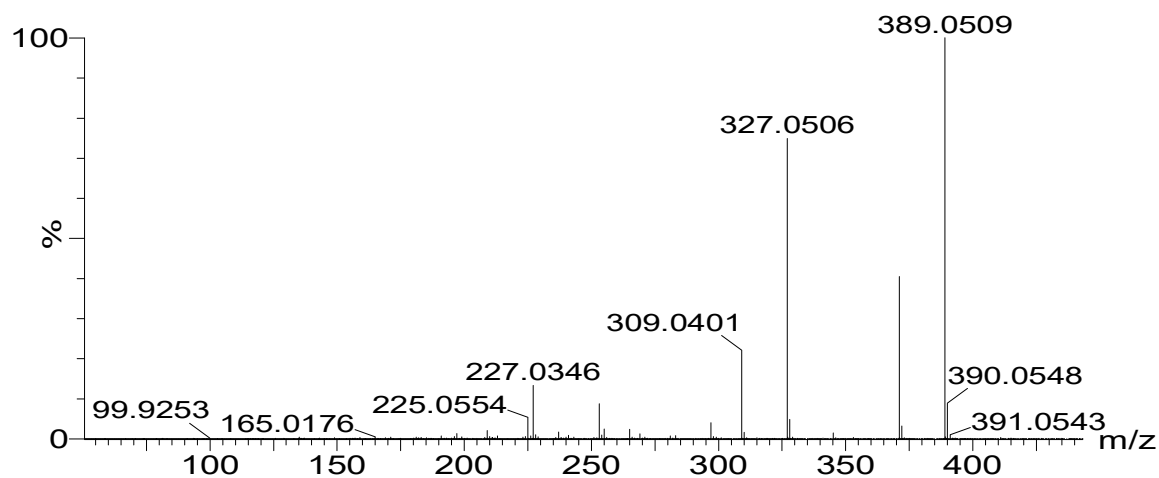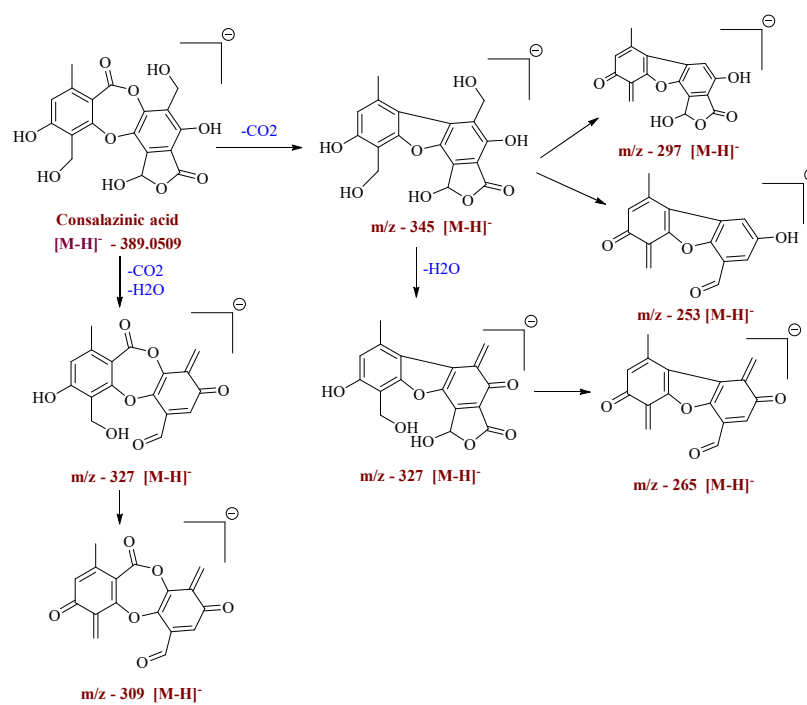

**Figure -S26:** MS/MS spectra and fragmentation pattern of Consalazinic acid (**1**)

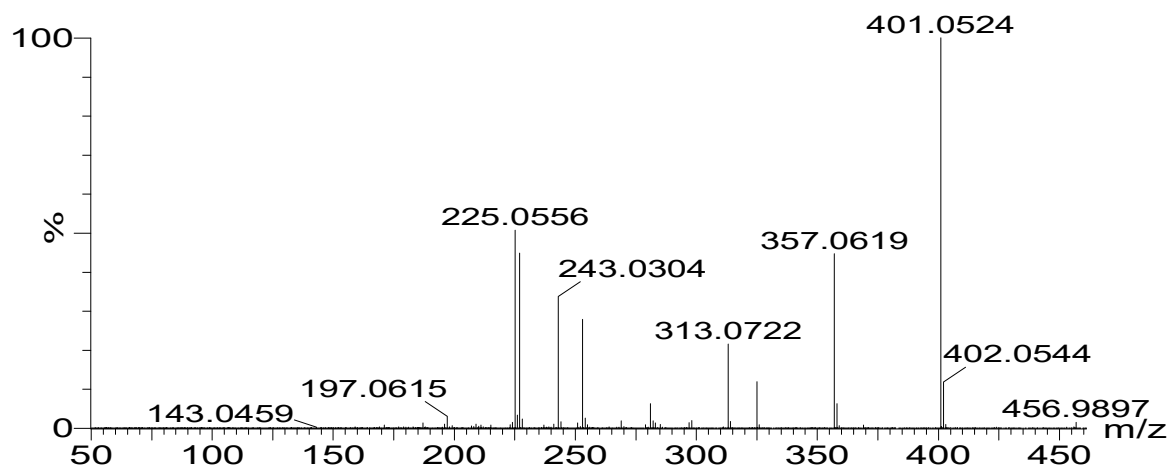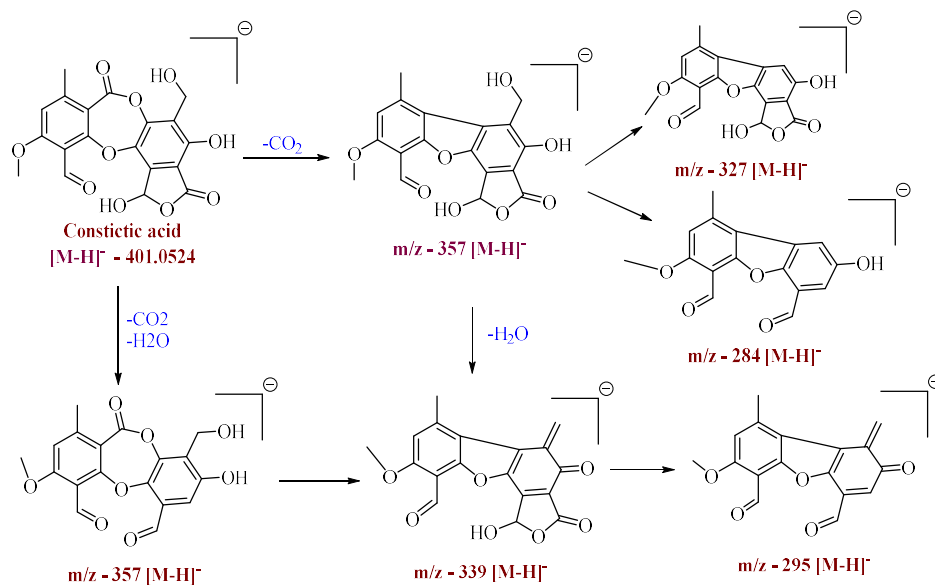

**Figure -S27:** MS/MS spectra and fragmentation pattern of Constictic acid (**2**)

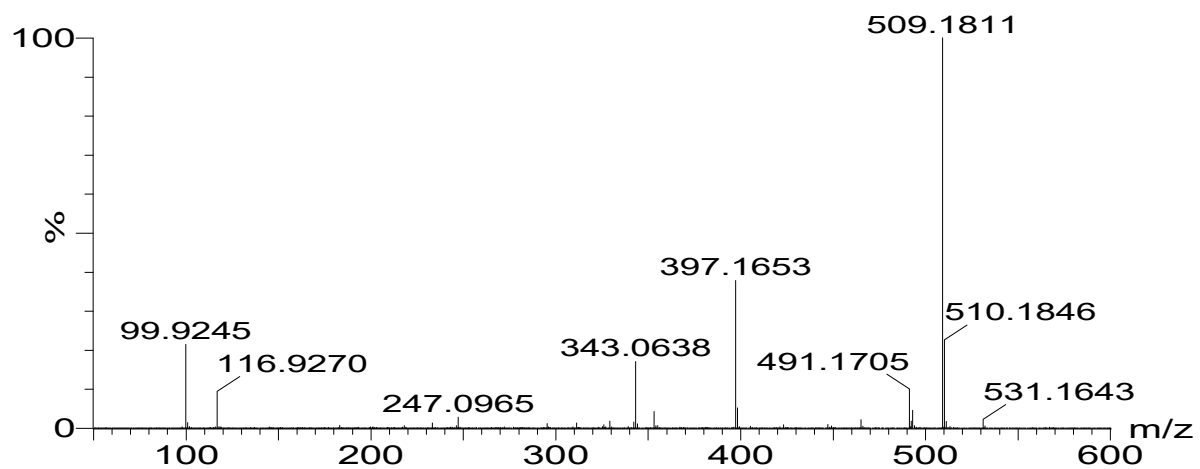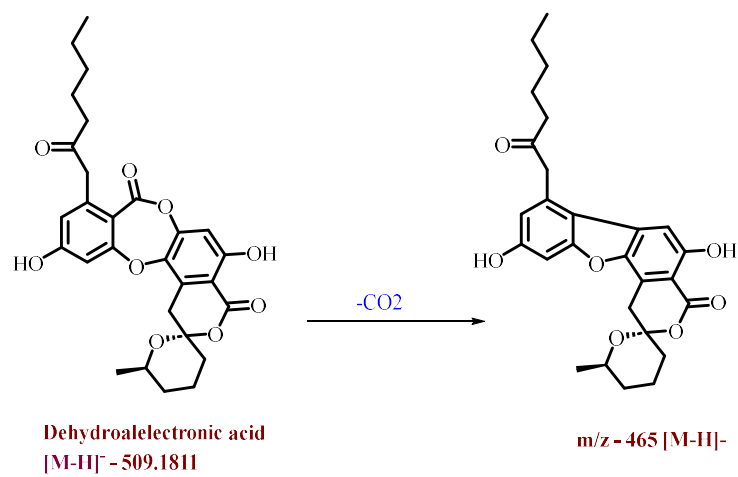

**Figure -S28:** MS/MS spectra and fragmentation pattern of Dehydroalelectronic acid (3)

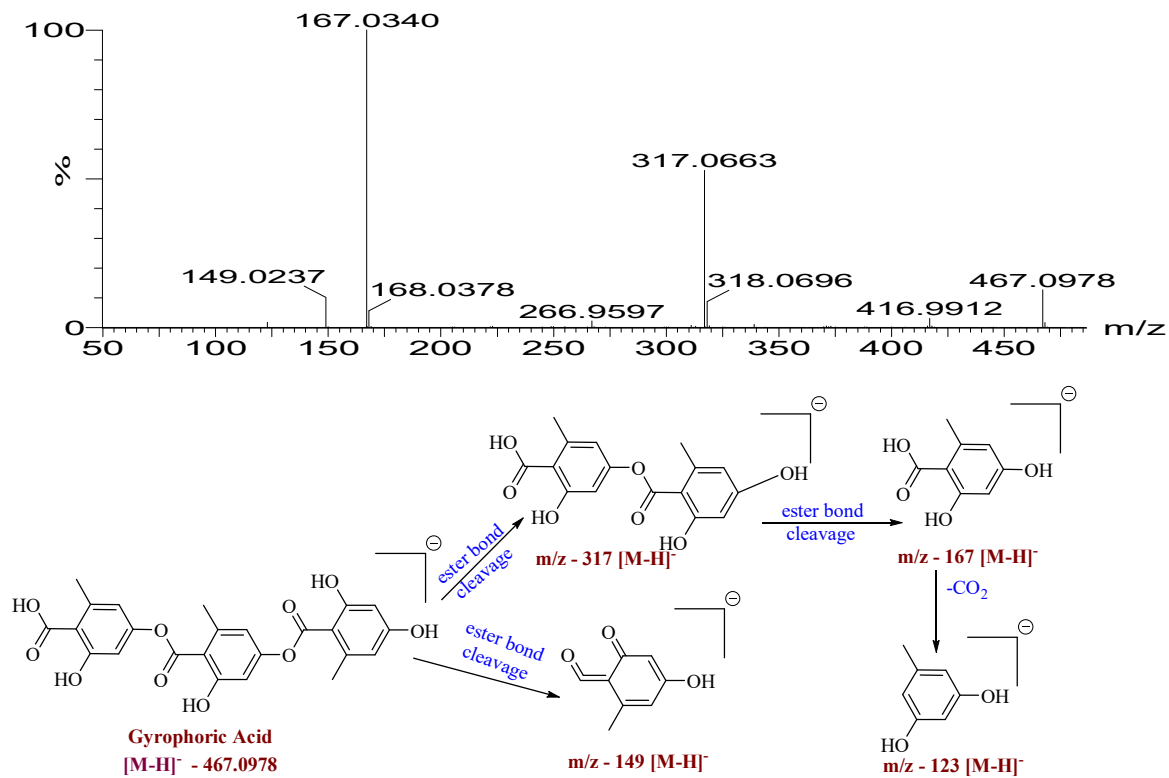

**Figure- S29:** MS/MS spectra and fragmentation pattern of Gyrophoric acid (4)

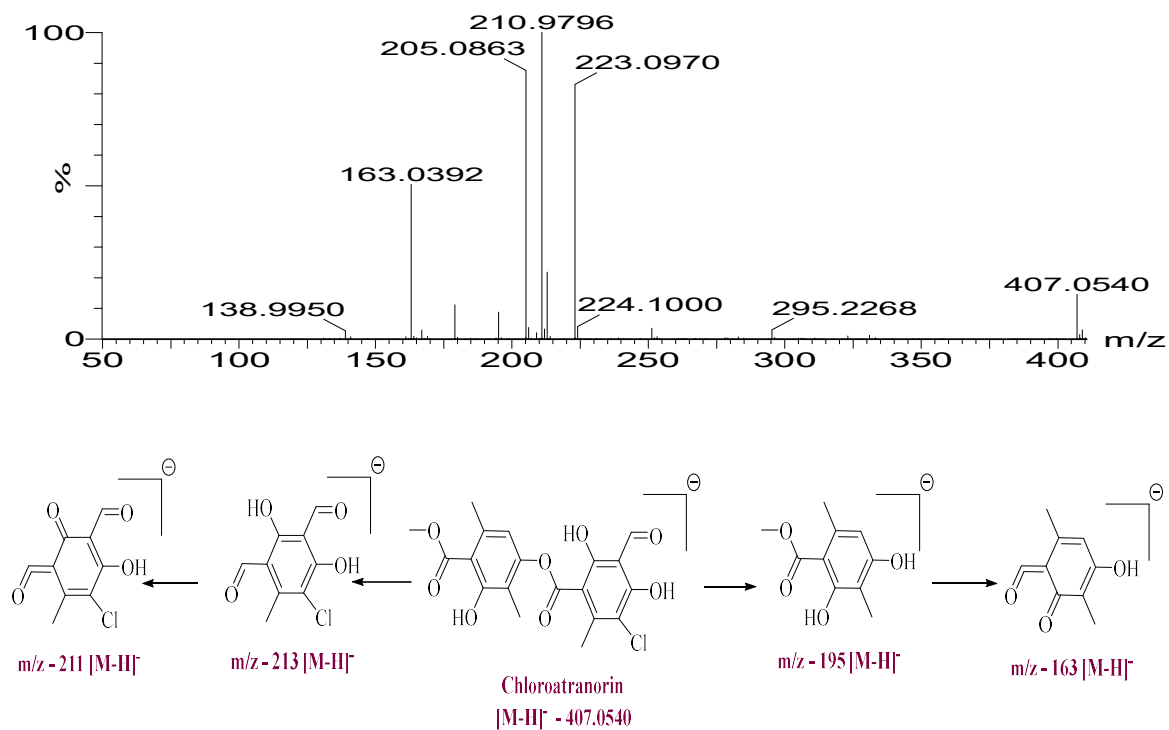

**Figure- S30:** MS/MS spectra and fragmentation pattern of Chloroatranorin (5)

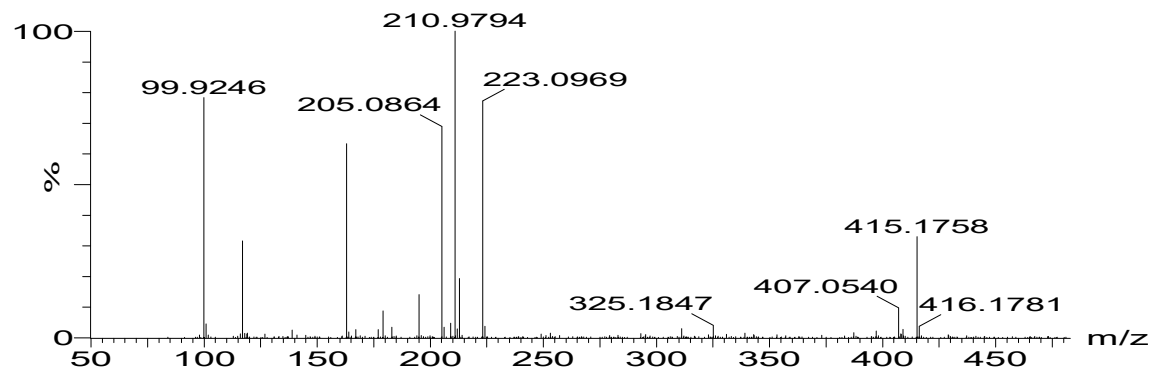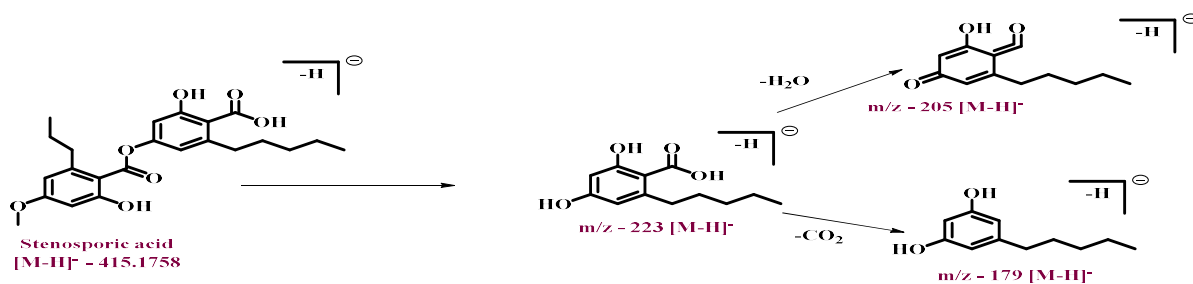

**Figure -S31:** MS/MS spectra and fragmentation pattern of Stenosporic acid (6)

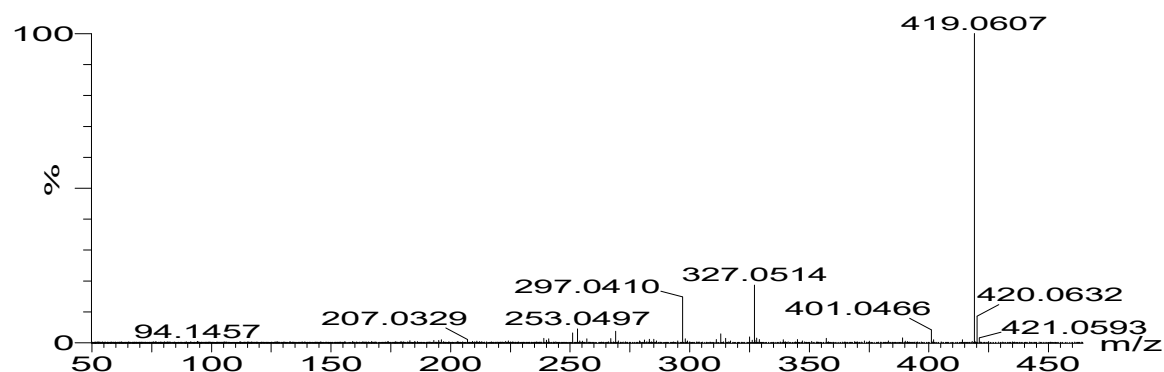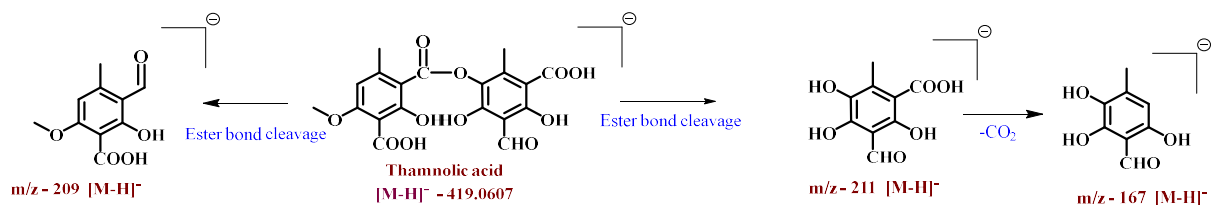

**Figure -S32:** MS/MS spectra and fragmentation pattern of Thamnic acid (7)

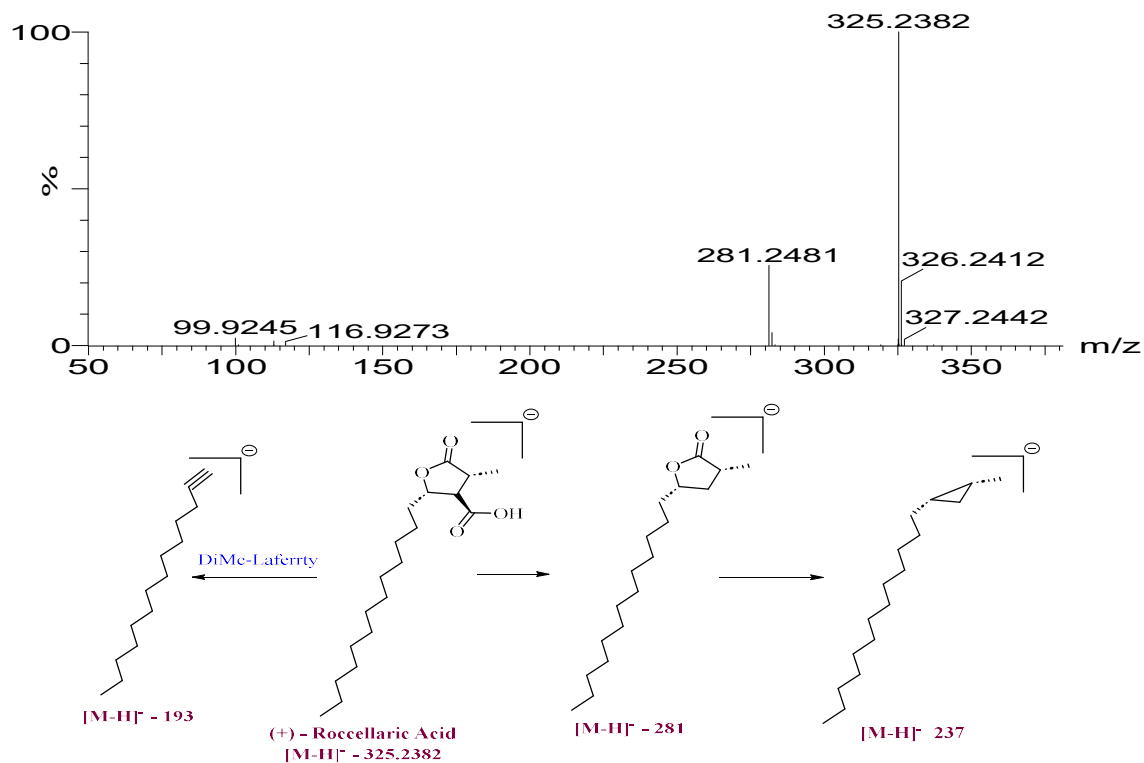

Figure -S33: MS/MS spectra and fragmentation pattern of Roccellaric acid (8)

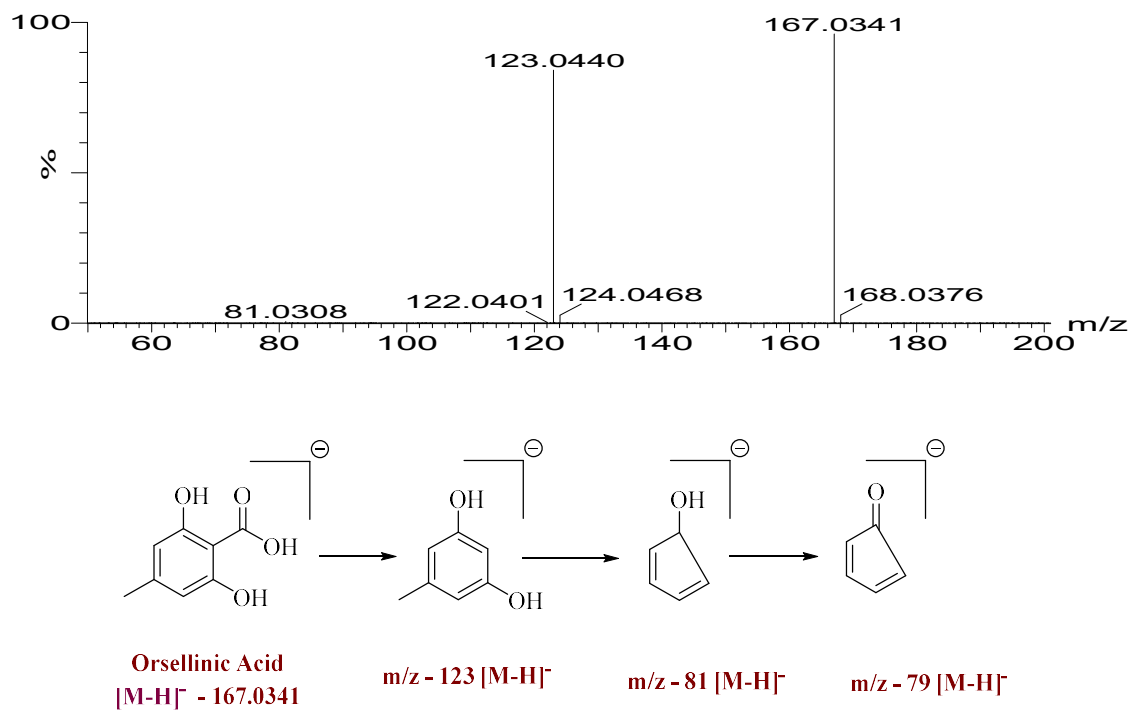

Figure- S34: MS/MS spectra and fragmentation pattern of Orsellinic acid (9)

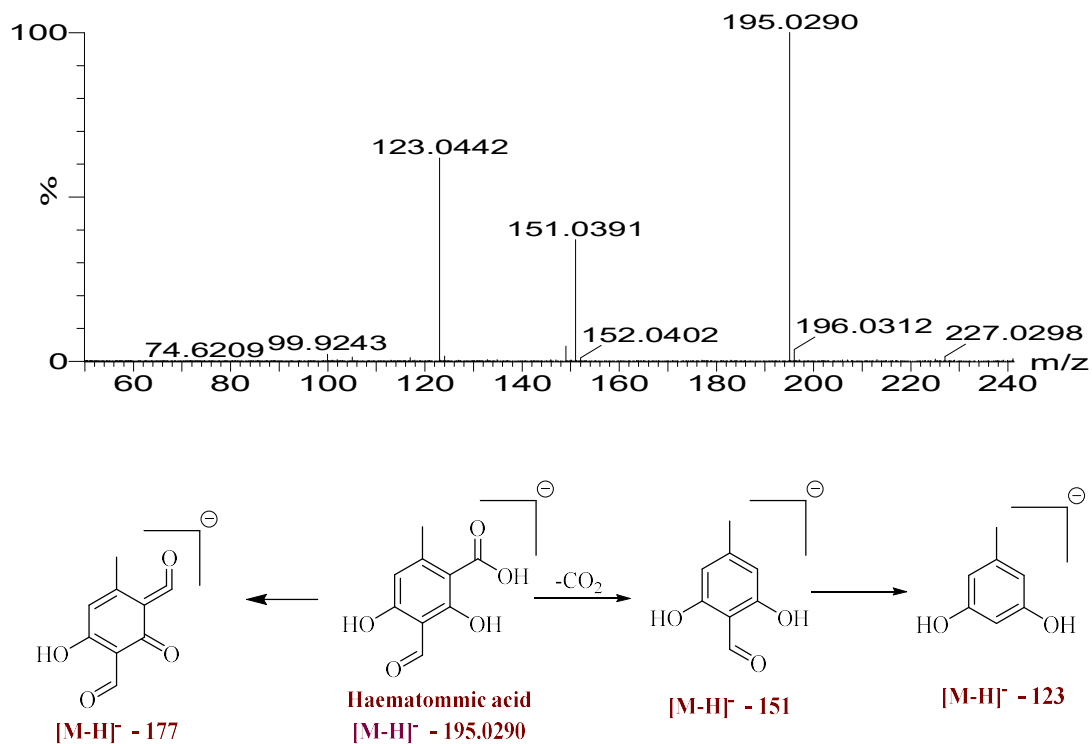

**Figure -S35:** MS/MS spectra and fragmentation pattern of Haematommic acid (10)

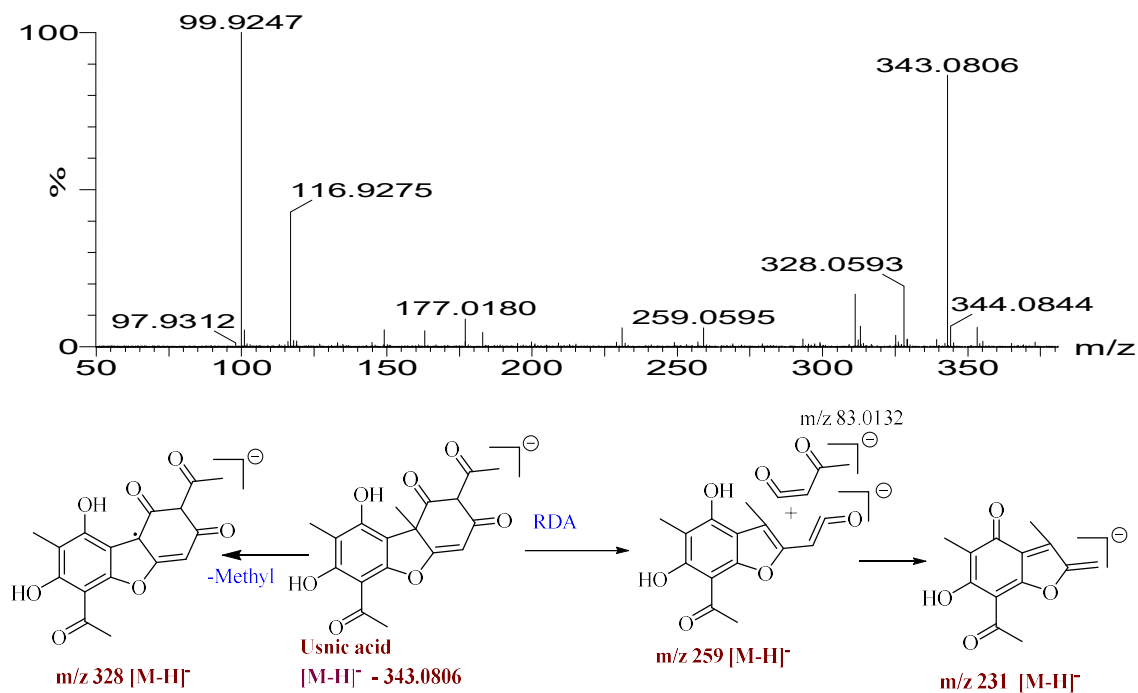

**Figure-S36:** MS/MS spectra and fragmentation pattern of Usnic acid (21)

**Table-S1:** Antihyperglycemic and antioxidant activities of isolates from *H. cirrhata*.

| <b>Compound name<br/>(2mg/ml)</b>  | <b>ABTS<br/>% Inhibition<br/>(IC<sub>50</sub>) µg/ml</b> | <b>DPPH<br/>% Inhibition<br/>(IC<sub>50</sub>) µg/ml</b> | <b>Intestinal α<br/>glucosidase<br/>% inhibition<br/>(IC<sub>50</sub>) µg/ml</b> | <b>DNA damage<br/>assay<br/>(%<br/>protection)</b> |
|------------------------------------|----------------------------------------------------------|----------------------------------------------------------|----------------------------------------------------------------------------------|----------------------------------------------------|
| EC extract                         | 95.79±2.13                                               | 98.23±2.02                                               | 61.23±0.46                                                                       | 89.63±0.89                                         |
| Salazinic acid(11)                 | 79.28±2.07<br>(2.11±0.04)                                | 54.20±3.03                                               | 82.10±1.76<br>(1.62±0.07)                                                        | 95.44±0.31                                         |
| Norlobaridone (12)                 | 99.95±0.39<br>(0.59±0.02)                                | 21.57±1.32                                               | 82.80±1.96<br>(1.41±0.01)                                                        | 82.80±9.93                                         |
| Atranorin (13)                     | 99.99±0.51<br>(0.068±0.02)                               | 55.91±0.46                                               | 76.69±3.6<br>(2.07±0.01)                                                         | 96.87±4.30                                         |
| Lecanoric acid (14)                | 98.55±0.61<br>(0.32±0.02)                                | 16.45±1.71                                               | 55.61±1.27                                                                       | 99.49±0.56                                         |
| Lichesterinic acid<br>(15)         | 16.37±1.35                                               | 47.31±2.49                                               | 48.40±1.56                                                                       | 90.55±2.47                                         |
| (+)Protolichesterinic<br>acid (16) | 22.88±0.90                                               | 29.45±1.87                                               | 44.79±0.78                                                                       | 90.45±0.02                                         |
| Methyl<br>hematommate1(7)          | 94.70±0.48<br>(0.53±0.03)                                | 54.03±2.96                                               | 35.64±0.78                                                                       | 98.39±0.11                                         |
| Iso- rhizonic acid,<br>(18)        | 97.96±1.41<br>(16.37±0.06)                               | 45.05±1.79                                               | 75.31±3.92<br>(1.99±0.03)                                                        | 91.48±0.30                                         |
| Atranol(19)                        | 99.23±0.51<br>(0.11±0.07)                                | 78.46±1.12<br>(1.73±0.02)                                | 28.71±0.54                                                                       | 94.16±2.45                                         |
| Methyl atrarate(20)                | 96.87±1.02<br>(1.44±0.05)                                | 63.02±3.66<br>(3.02±0.07)                                | 33.14±1.17                                                                       | 92.15±0.35                                         |
| Ascorbic acid<br>(2mg/ml)          | 99.05±0.62<br>(0.079±0.01)                               | 83.68±2.72<br>(1.59±0.05)                                |                                                                                  | -                                                  |
| Acarbose (2mg/ml)                  | -                                                        | ±                                                        | 67.40±3.08<br>(2.58±0.85)                                                        | -                                                  |

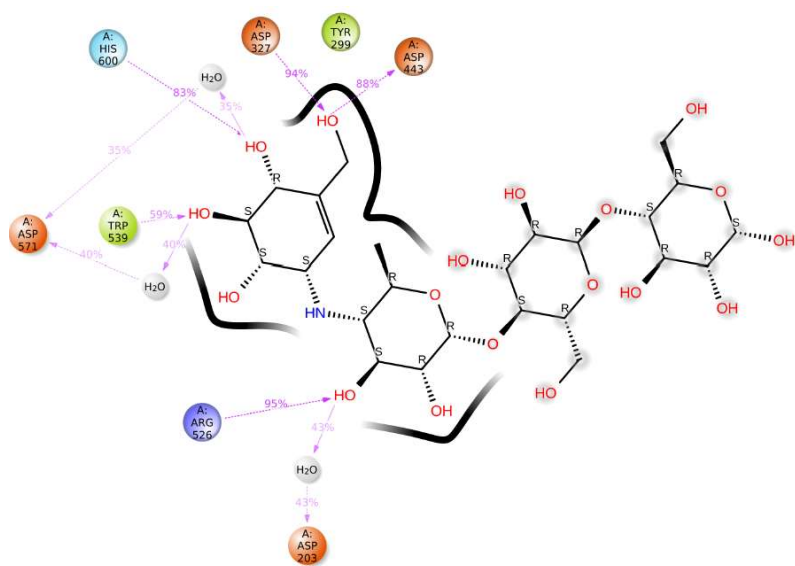

**Figure- S37.** Percentage interaction plot of Acarbose with catalytic residues

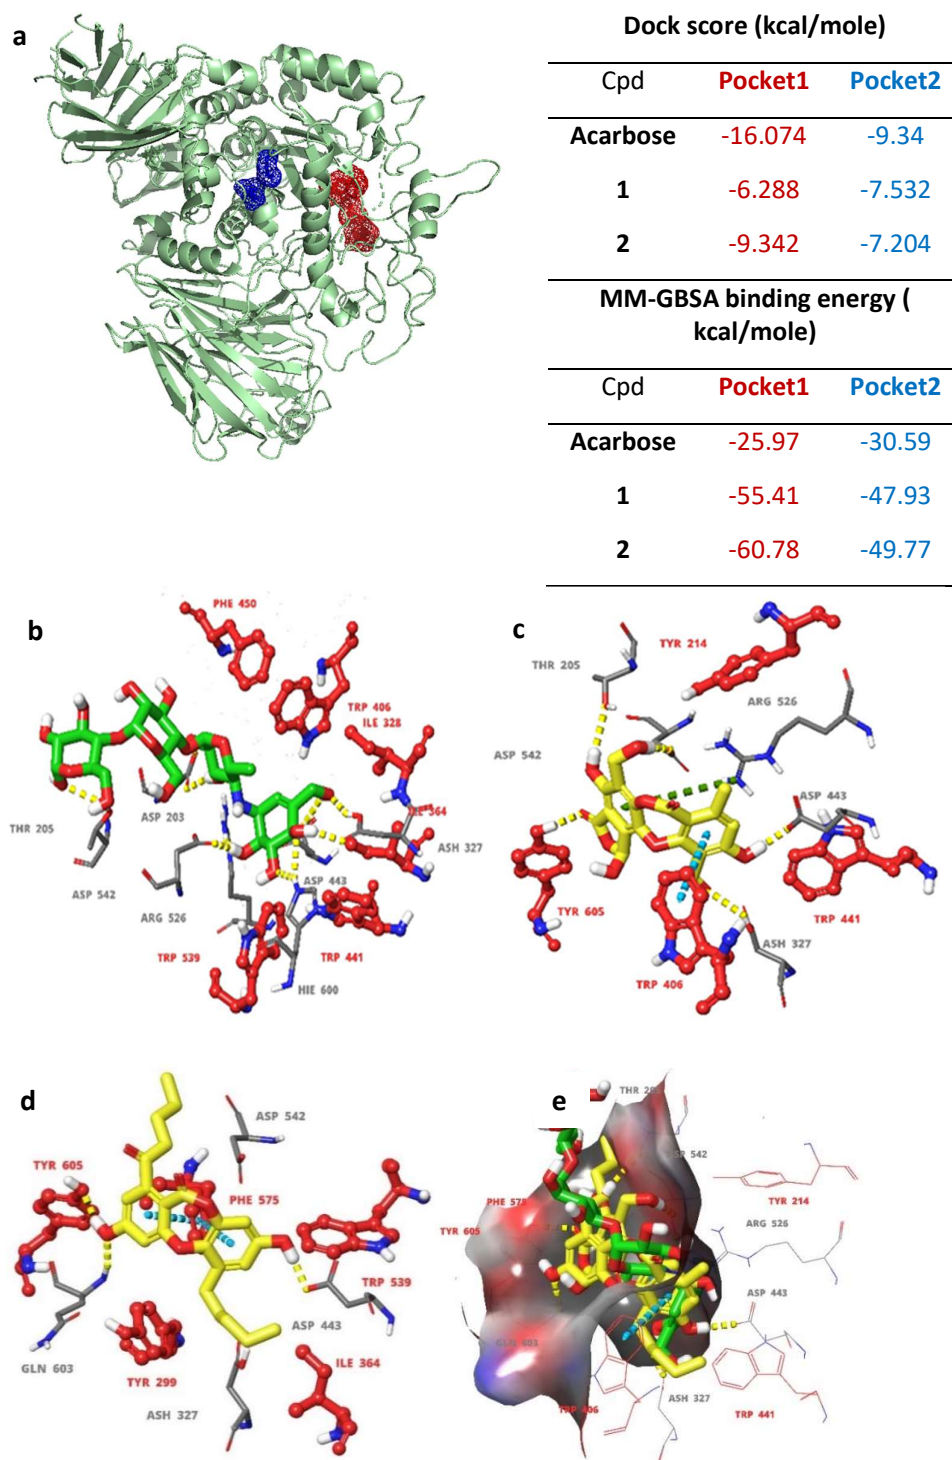

**Figure-S38.** a) Binding pocket of  $\alpha$ -glucosidase catalytic (red) and allosteric pocket (blue); b, c, d) interaction of acarbose (green stick), salazinic acid and norlobaridone (yellow sticks) with catalytic residues (pocket 1) respectively; e) overlap of acarbose, salazinic acid and norlobaridone. Hydrogen bonds (yellow dotted lines);  $\pi$ - $\pi$  stackings (blue dotted lines),  $\pi$ -cation (green dotted lines) and red ball & sticks/wires/other macromodel sticks represents active residues.

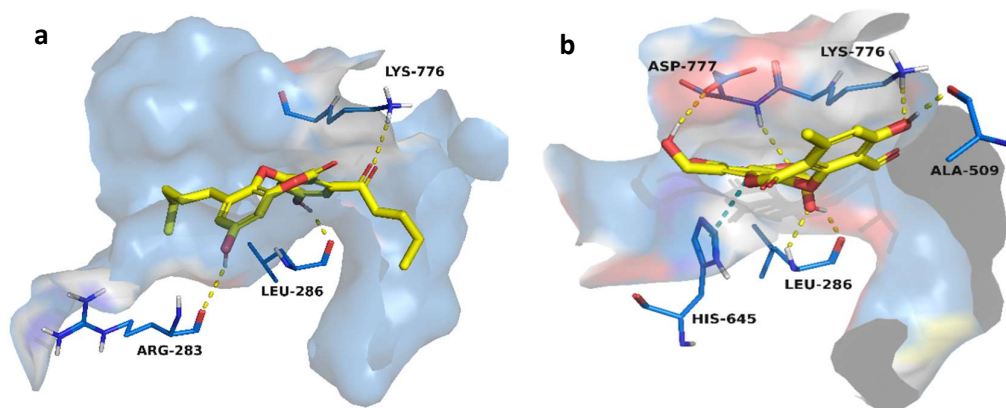

**Figure- S39.** a) Norlobaridone (**2**) and its alkyl chain occupied in deeper in allosteric pocket groove; b) Salazinic acid (**1**) and its interaction regimen. Hydrogen bonds (yellow dotted lines);  $\pi$ - $\pi$  stackings (blue dotted lines),  $\pi$ -cation (green dotted lines) and red ball & sticks/wires/other macromodel sticks represents active residues.

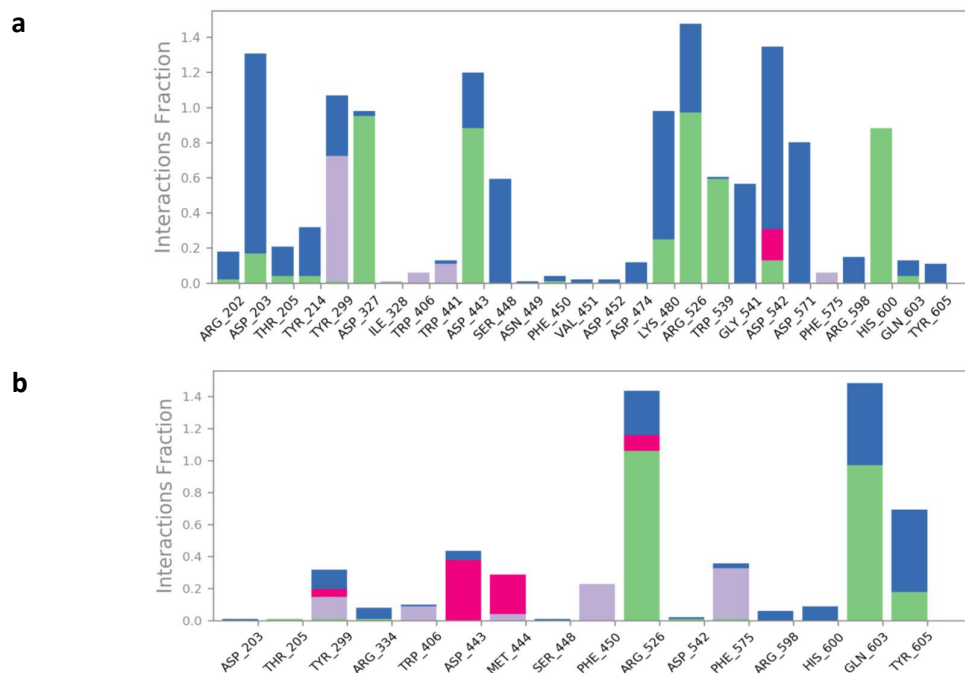

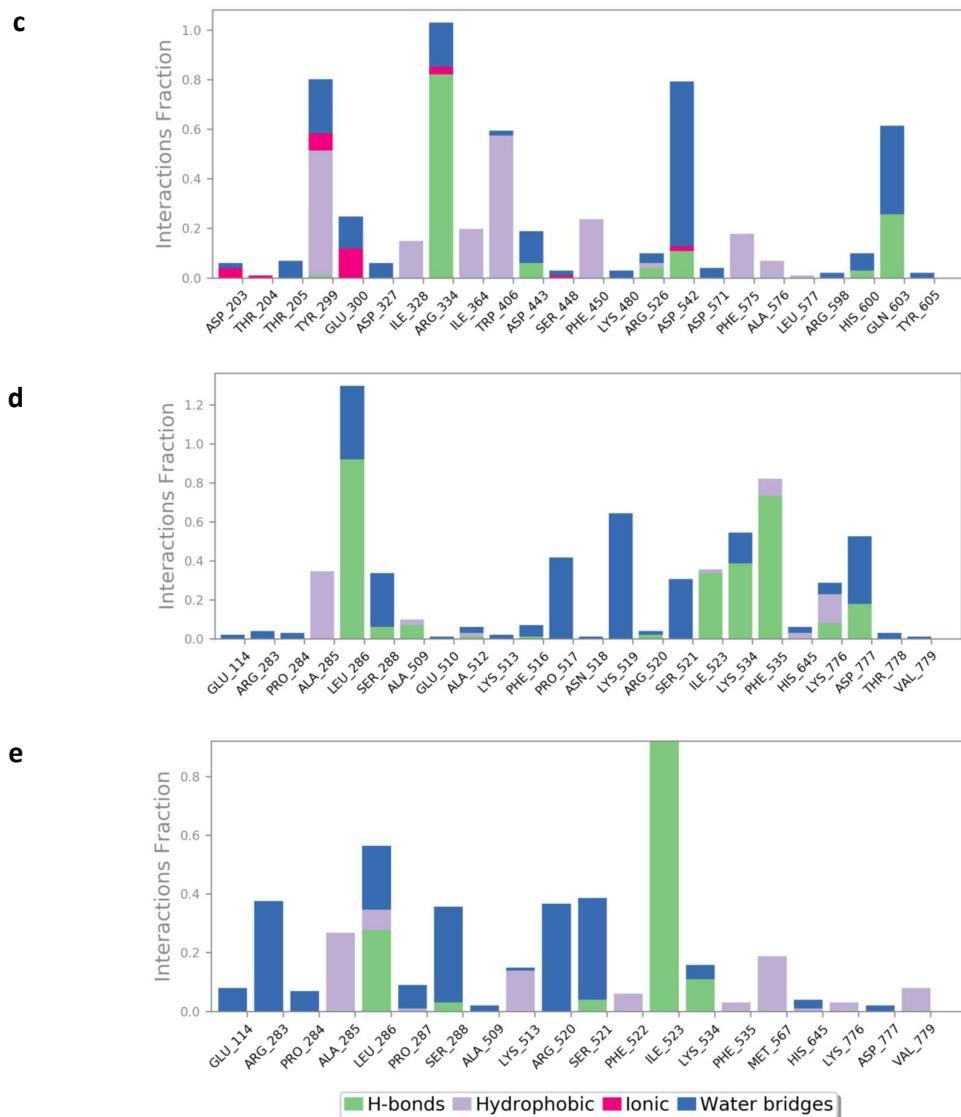

**Figure- S40.** a, b & c) Interaction network of acarbose (a), salazinic acid (b) and norlobaridone (c) in 100 simulation with active pocket. (d) & (e) Interaction network of salazinic acid and norlobaridone, respectively, with allosteric pocket residues.
